# Supplementary material for: Surface manipulation for prevention of migratory viscous crude oil fouling in superhydrophilic membranes
Source: PubMed Central journal article supplement (PMC10169857; doi:10.1038/s41467-023-38419-3), 2023-05-09
Supplement: 41467_2023_38419_MOESM1_ESM.pdf [file 41467_2023_38419_MOESM1_ESM.pdf]

1  
2  
3  
4  
5  
6  
7  
8  
9  
10  
11  
12  
13  
14  
15  
16  
17  
18  
19  
20  
21  
22  
23  
24  
25  
26  
27  
28  
29

## Supplementary Information

### Surface Manipulation for Prevention of Migratory Viscous Crude Oil Fouling in Superhydrophilic Membranes

Yuanyuan Zhao<sup>[a]</sup>, Xiaobin Yang<sup>[a]</sup>, Zhongjun Cheng<sup>[a]</sup>, Cher Hon Lau<sup>[b]</sup>, Jun Ma<sup>[c]</sup>, Lu Shao<sup>[a]\*</sup>

<sup>[a]</sup> MIIT Key Laboratory of Critical Materials Technology for New Energy Conversion and Storage, State Key Laboratory of Urban Water Resource and Environment, School of Chemistry and Chemical Engineering, Harbin Institute of Technology, Xidazhi 92, Harbin 150001, PR China

<sup>[b]</sup> School of Engineering, The University of Edinburgh, The King's Buildings, Mayfield Road, EH9 3JL, United Kingdom

<sup>[c]</sup> School of Environments; Harbin Institute of Technology; Harbin 150001, PR China

\*e-mail: [shaolu@hit.edu.cn](mailto:shaolu@hit.edu.cn)

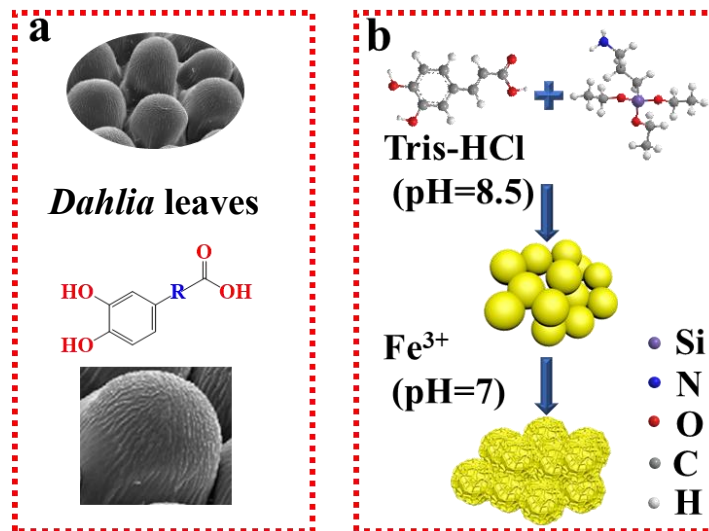

31

32 **Supplementary Figure 1|** (a) Structures of caffeoyl esters and flavonoids in *dahlia*  
 33 leaves<sup>1</sup>; (b) Synthesis of wrinkled patterns on smooth microparticles via a two-step  
 34 process: 1) Synthesizing smooth hydrophilic microparticles. 2) Creating cuticle-like  
 35 nanostructures on microparticles surfaces via microparticles and  $\text{Fe}^{3+}$  coordination.

36

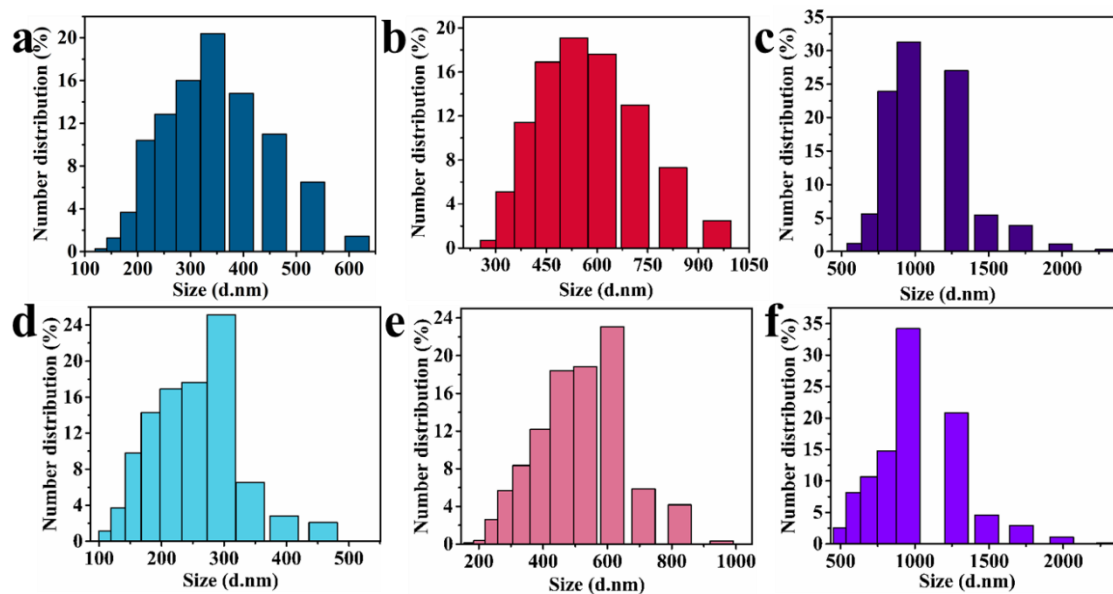

37

38 **Supplementary Figure 2|** The responding size distribution of microparticles of (a)  
 39 PCA/AP0.4; (b) PCA/AP0.8; (c) PCA/AP1.6; (d) WPM 0; (e) WPM I; (f) WPM II.

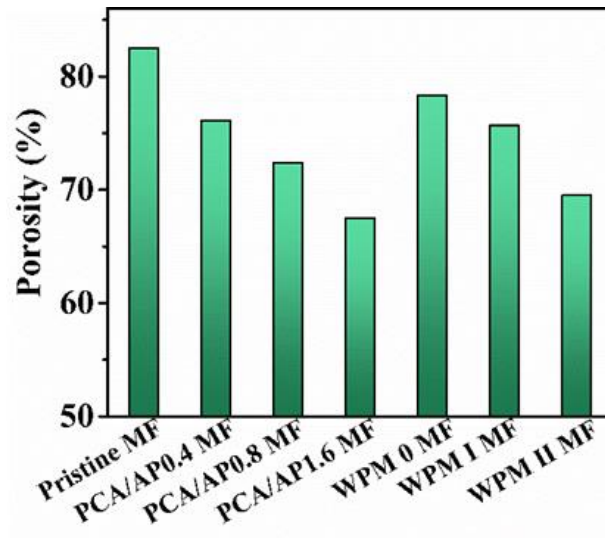

40

41 **Supplementary Figure 3|** (a) The porosity of the membranes.

42

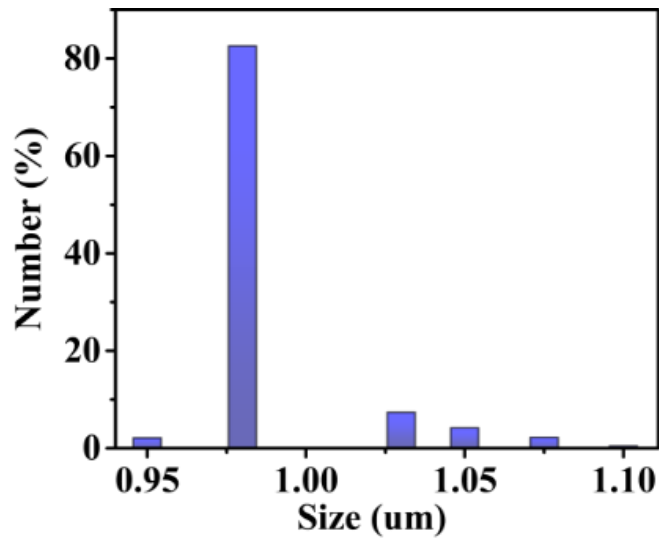

43

44 **Supplementary Figure 4|** The responding pore size distribution of the pristine MF.

45

46

47

48

49

50

51

52

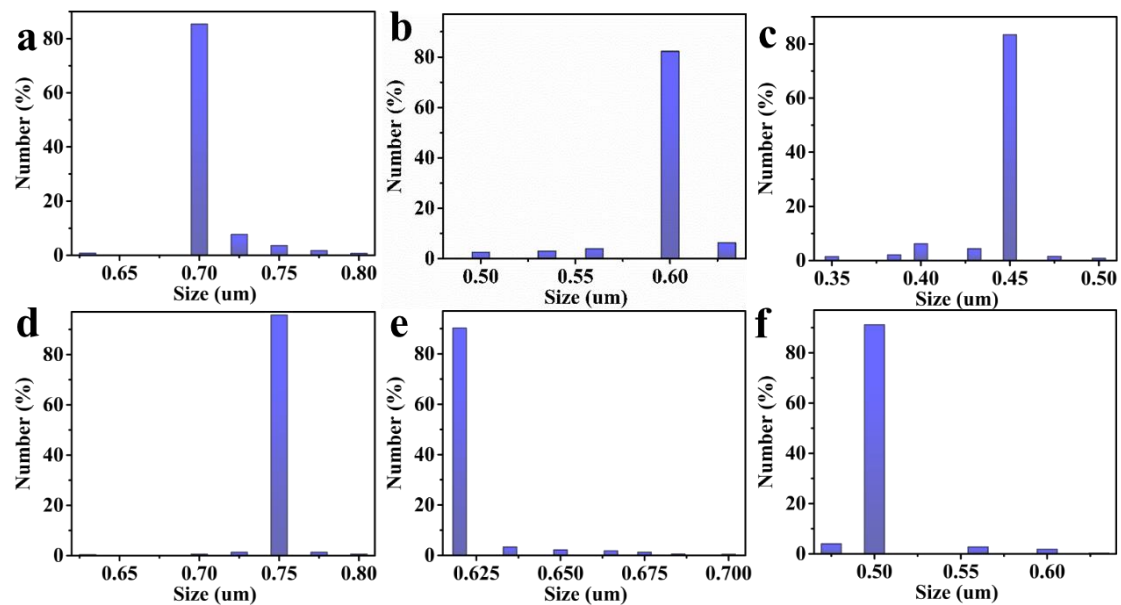

53

54 **Supplementary Figure 5** | The responding pore size distribution of (a) PCA/AP0.4; (b)  
 55 PCA/AP0.8; (c) PCA/AP1.6; (d) WPM 0; (e) WPM I; (f) WPM II MF.

56

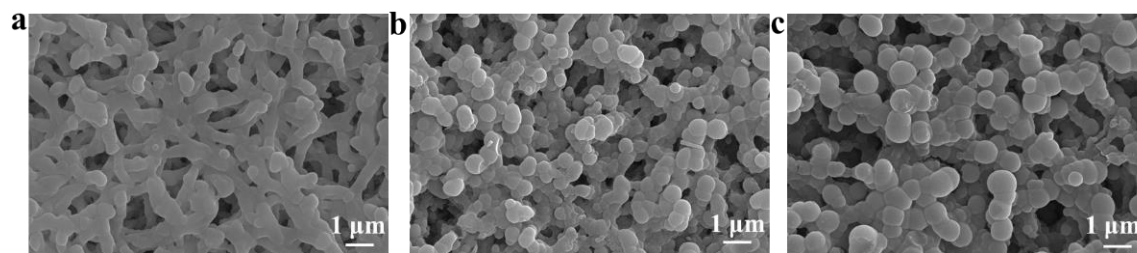

57

58 **Supplementary Figure 6** | SEM images of the surface of (a) PCA/AP0.4; (b)  
 59 PCA/AP0.8; (c) PCA/AP1.6 MF.

60

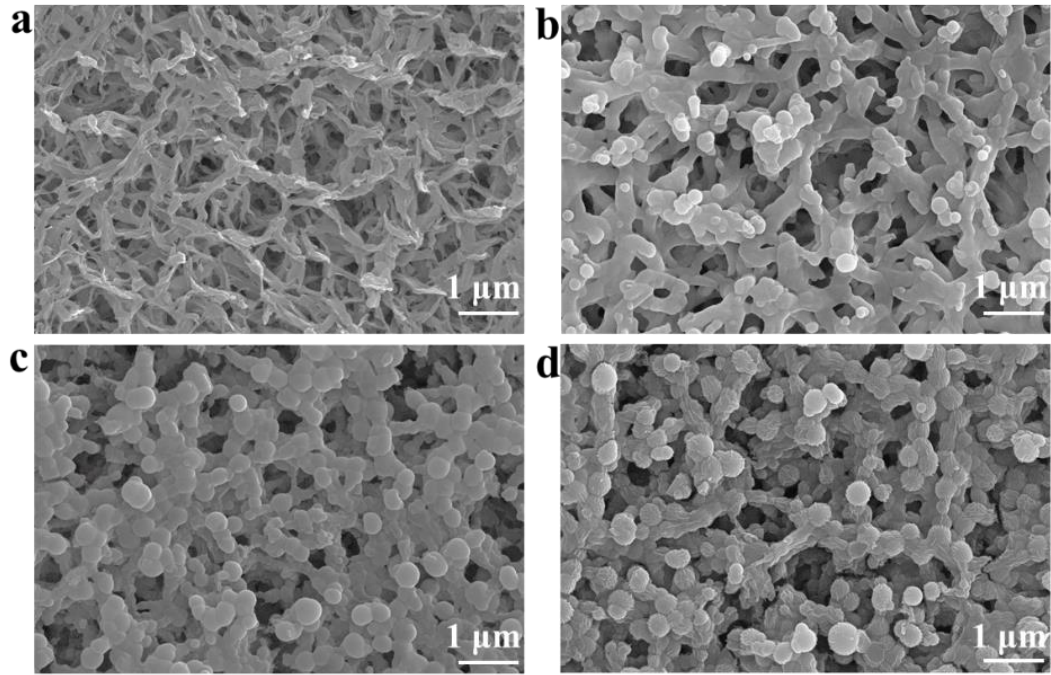

61

62 **Supplementary Figure 7** | (a-d) SEM images of the pristine MF, WPM 0, WPM I, and

63 WPM II MF.

64

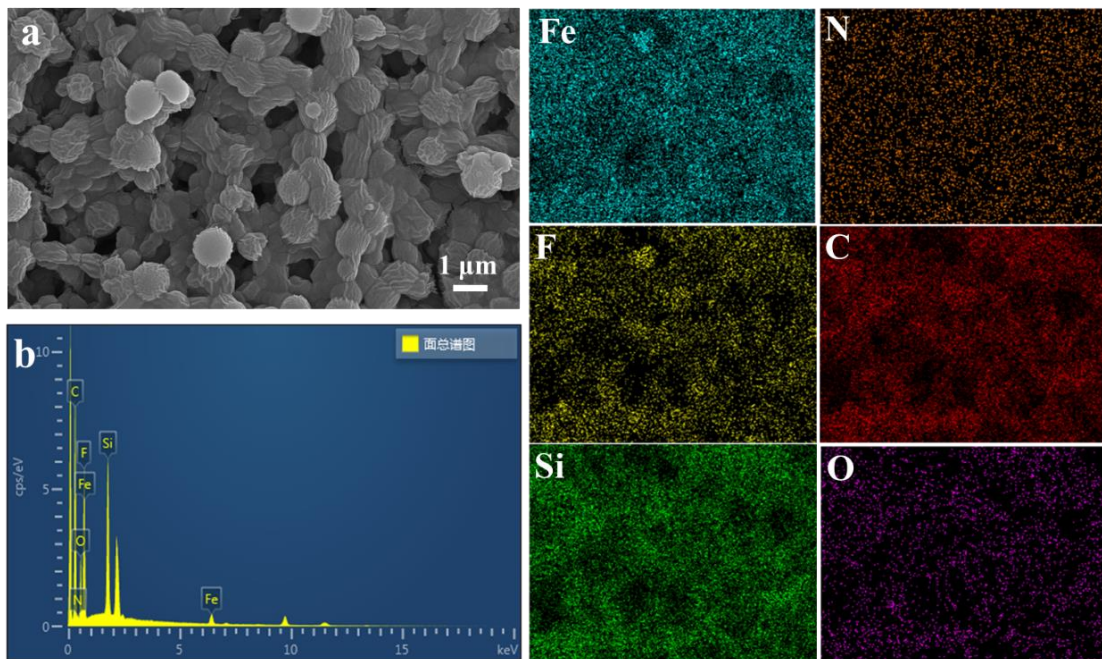

65

66 **Supplementary Figure 8** | (a) SEM images; (b) Corresponding EDS mapping of the

67 WPM II MF.

68 Compared with the typical fibrous membrane pore structure of the pristine MF, the pore

69 size and porosity of PCA/AP MFs decreased with the increase of the APTES content,

70 which was mainly due to the deposition of gradual increase PCA/AP microparticles on  
71 the surface of the membrane. While, the pore size and porosity of each WPM MFs had  
72 a weak upward trend compared to the corresponding PCA/AP MFs, which was mainly  
73 due to the deformation of the microparticles surface after Fe<sup>3+</sup> modification. The pore  
74 size of WPM 0 MF (0.75 μm) increased 7.1% than that of PCA/AP0.4. The pore size  
75 of WPM I MF (0.625 μm) increased 4.1% than that of PCA/AP0.8 and the pore size of  
76 WPM II MF (0.5 μm) increased 11.1% than that of PCA/AP1.6. This varying degree of  
77 wrinkling reduced the space for microparticles to be coated on WPM MFs surface  
78 resulting in the pore size and porosity of WPM MFs would have a weak increase, which  
79 also can be confirmed by SEM image of each membrane in Supplementary Figs. 6 and  
80 7. The results of SEM images and corresponding EDS mapping of the membrane in  
81 Supplementary Fig. 8 showed that we chose the synthesis process of the membranes  
82 has been shaken in a water bath to ensure more uniform distribution of microparticles  
83 on the membrane surface.

84

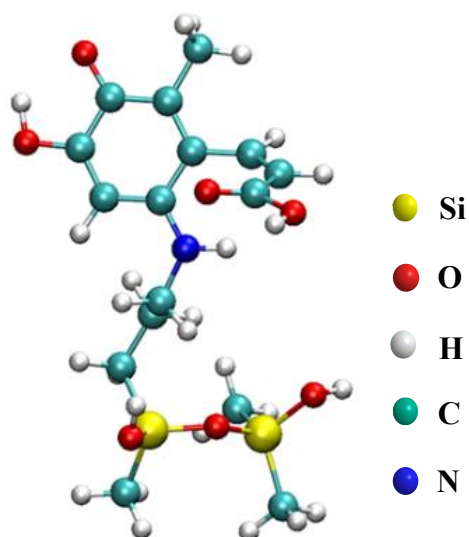

86 **Supplementary Figure 9** | Optimized geometry of PCA/AP.

87

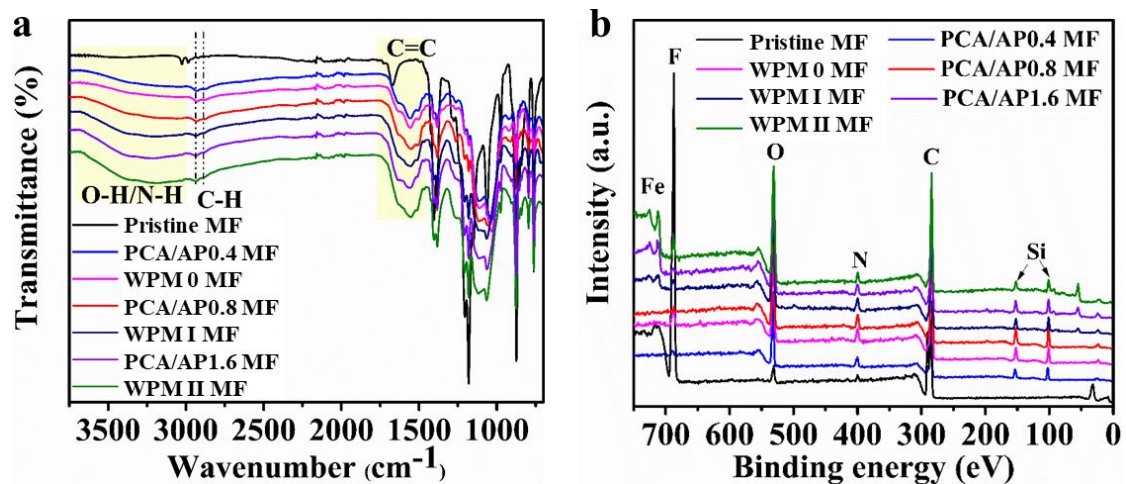

88

89 **Supplementary Figure 10|** (a) FTIR spectra and (b) XPS spectra of all membranes.

90

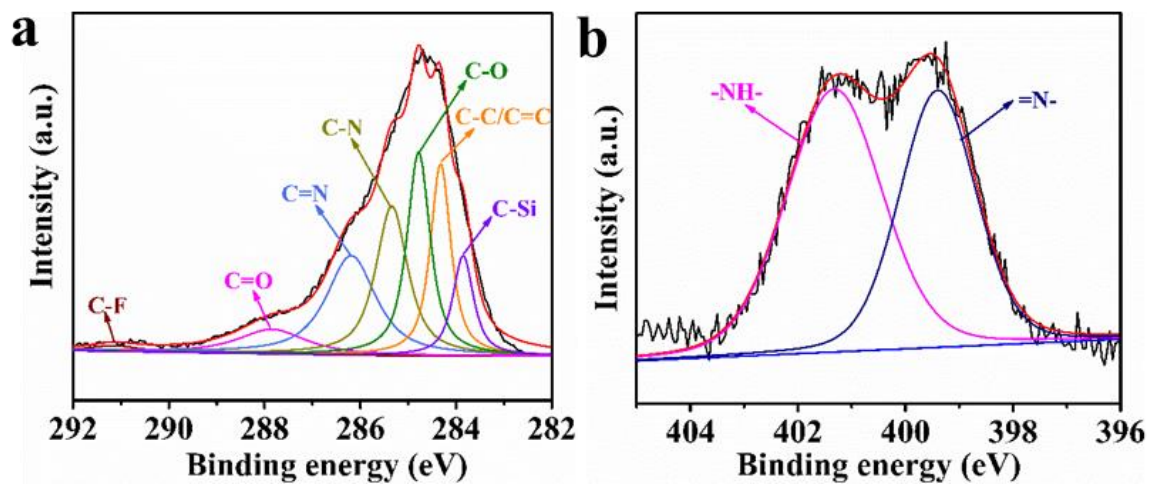

91

92 **Supplementary Figure 11|** The C 1s and N 1s spectrum of PCA/AP1.6 MF.

93 The wide absorption peak at 3000-3500  $\text{cm}^{-1}$  were attributed to the stretching of O-  
 94 H/N-H in the phenolic hydroxyl group/amino group of the modification membranes.

95 The broad absorption band at 1650  $\text{cm}^{-1}$  was assigned to benzene ring C=C of PCA, as  
 96 well as, the new peaks at 1125 and 910  $\text{cm}^{-1}$  were corresponding to Si-O-Si and Si-OH,  
 97 respectively

98

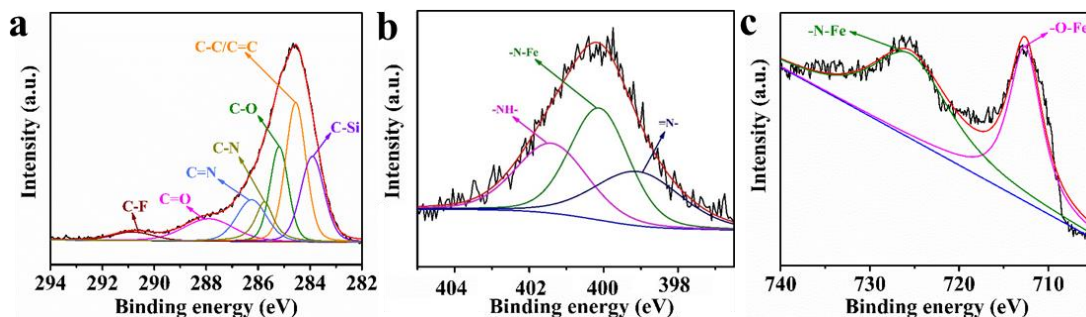

99

100 **Supplementary Figure 12|** The C 1s, N 1s and Fe 2p spectrum of WPM II MF<sup>2</sup>.

101

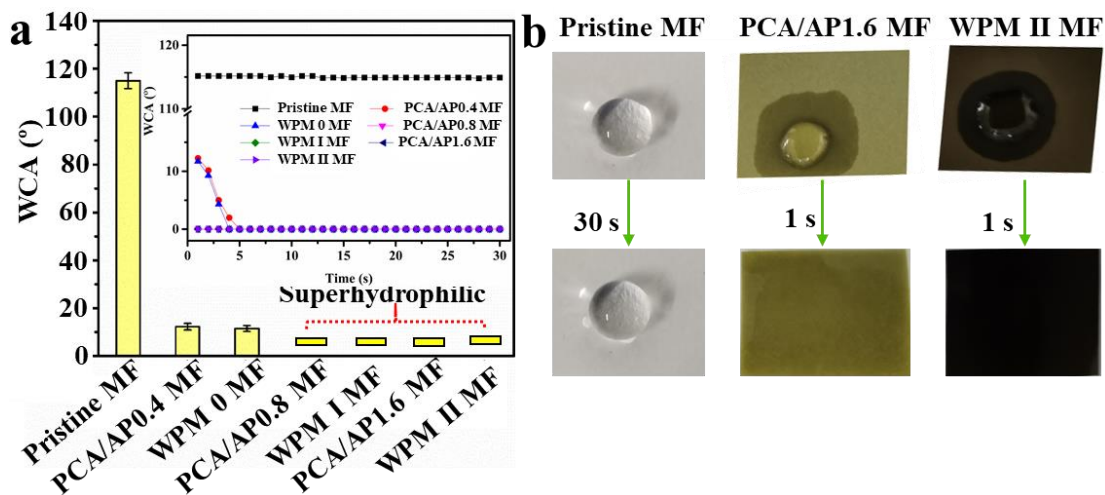

102

103 **Supplementary Figure 13|** (a) and (b) WCA and UOCA of different membranes. Error  
 104 bars represent the standard deviations obtained from three membranes

105 Water contact angle (WCA) is comprehensively investigated the surface wettability of  
 106 membranes. The pristine MF showed high hydrophobic with the initial WCA of 120 °,  
 107 and water (30 μL) remained for 30 seconds without spreading on the surface of this  
 108 membrane (see Supplementary Fig. 13). Diversely, thanks to the hydrophilic phenolic  
 109 hydroxyl group/amino group, PCA/AP MFs were more affinity to water. PCA/AP0.8,  
 110 PCA/AP1.6 MF and all the WPM MFs reached superhydrophilicity. These results  
 111 showed the coating microparticles on the membrane surface endowed them with  
 112 excellent affinity with water.

113



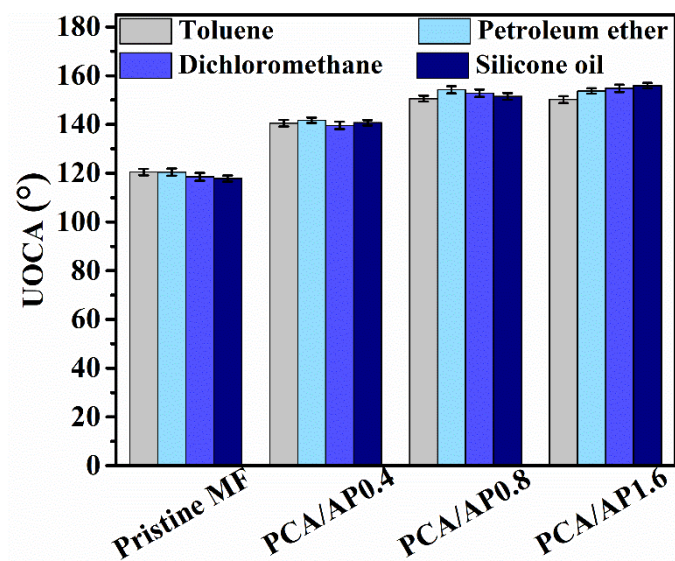

114

115 **Supplementary Figure 14** | The UOCA of PCA/AP MFs. Error bars represent the

116 standard deviations obtained from three membranes

117

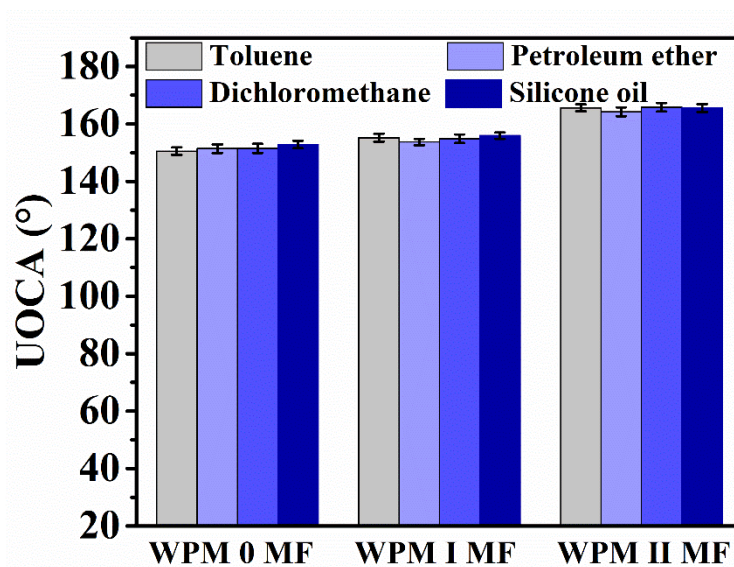

118

119 **Supplementary Figure 15** | The UOCA of WPM MFs. Error bars represent the

120 standard deviations obtained from three membranes

121

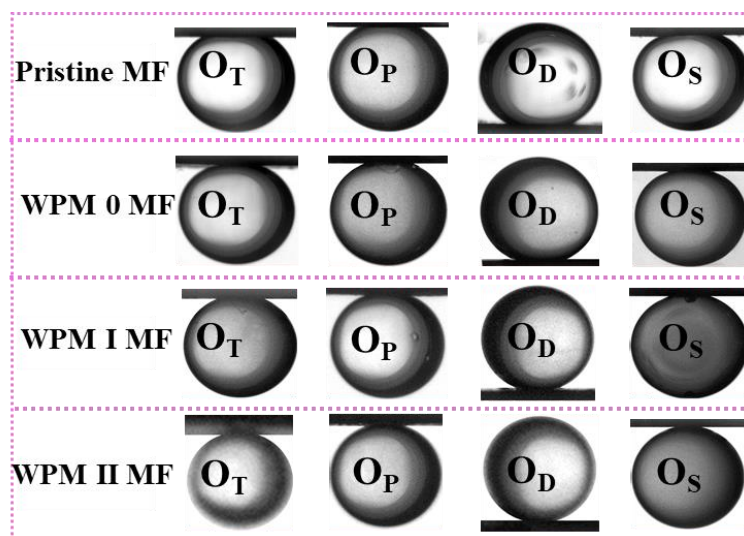

122

123 **Supplementary Figure 16** Photographs of the underwater oil droplets on the surface  
 124 of different membranes ( $O_T$  is UOCA of toluene on the membrane surface;  $O_P$  is UOCA  
 125 of petroleum ether on the membrane surface;  $O_D$  is UOCA of dichloromethane on the  
 126 membrane surface;  $O_S$  is UOCA of silicone oil on the membrane surface).

127 Compared with the original MF, under water oleophobic performance of the  
 128 PCA/AP0.4 membrane was enhanced (UOCA were about  $140^\circ$ ). Furthermore, both of  
 129 PCA/AP0.8 and PCA/AP1.6 MF had underwater oleophobicity with UOCA all greater  
 130 than  $145^\circ$ . In addition, after modified by  $Fe^{3+}$ , WPM MFs possessed stronger  
 131 underwater superoleophobicity properties than that of the corresponding PCA/AP MFs  
 132 (see Supplementary Figs. 14-16). The result was mainly attributed to the synergistic  
 133 effect of the construction of micro/nano structure and abundant hydrophilic groups.

134

135

136

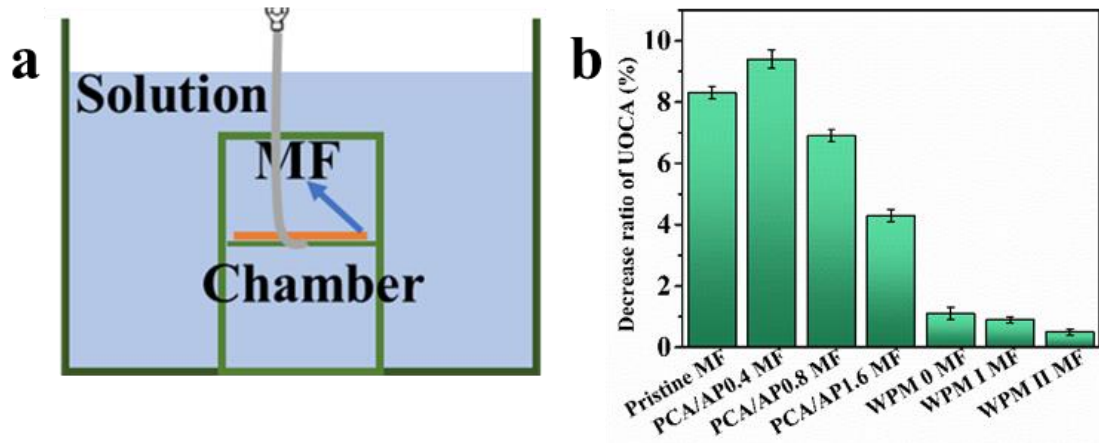

137

138 **Supplementary Figure 17** | (a) Device suitable for testing UOCA and (b) The decrease  
 139 ratio of the UOCA values for each membrane after immersed in alkaline aqueous  
 140 solution (pH=13) for 24 h. The error bar represents the standard deviation of the  
 141 measurements.

142

143

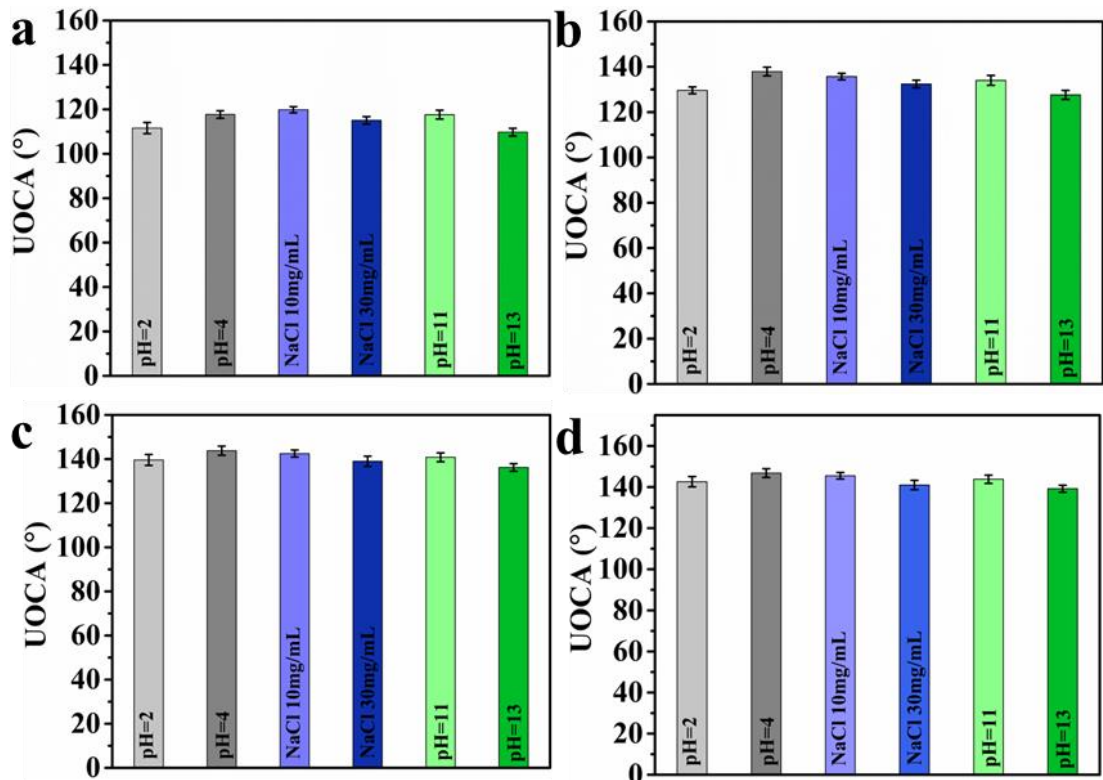

144

145 **Supplementary Figure 18** | (a) The pristine MF; (b) PCA/AP0.4; (c) PCA/AP0.8; (d)  
 146 PCA/AP1.6. The error bar represents the standard deviation of the measurements.

147

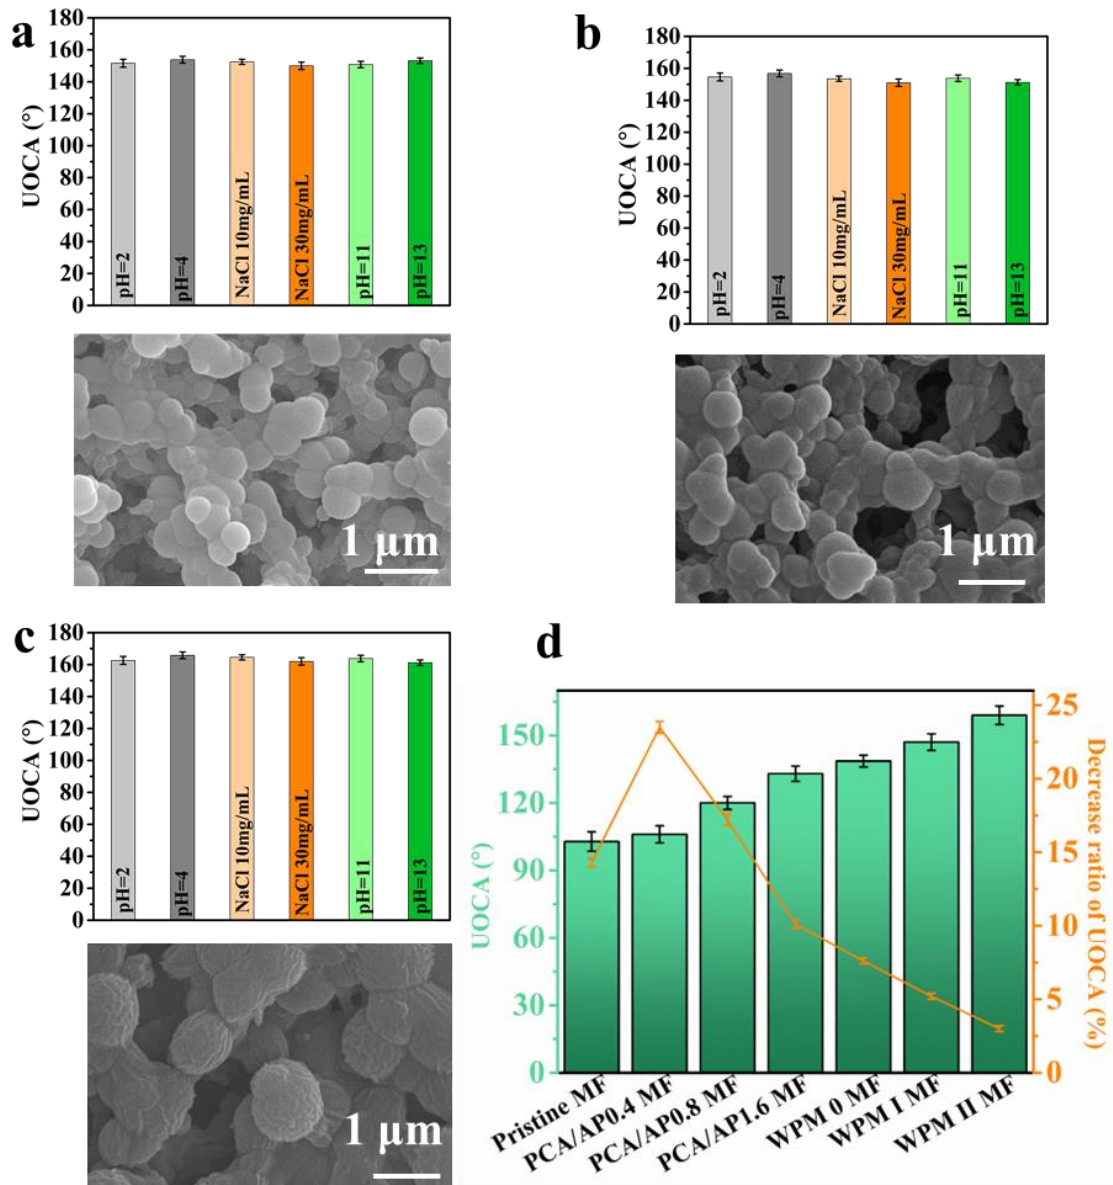

148

149 **Supplementary Figure 19** | The UOCA of (a) WPM 0; (b) WPM I; (c) WPM II MF  
 150 after immersed in acidic, alkaline aqueous solution or saline solution for 24 h. (d)  
 151 UOCA and the decrease ratio of the values for each membrane after immersed in acidic  
 152 solution for 7 days. The error bar represents the standard deviation of the measurements.  
 153 To further investigate the chemical stability of all membranes, we detected the UOCA  
 154 of the membranes after immersing it into acidic, alkaline or saline solution for 24 h (see  
 155 Supplementary Figs. 17-19). The results show the well chemical stability of WPM MFs,  
 156 while UOCAs of PCA/AP membranes showed a downward trend under the acid, base  
 157 or saline solution environment. Because of the greater drop of UOCA after immersed  
 158 in alkaline aqueous solution (pH=13) for 24 h, we further tested the decrease ratio of

159 the UOCA values for each membrane after immersed in alkaline aqueous solution  
 160 (pH=13) for 24 h. The results showed that the decrease ratio of UOCA of PCA/AP MFs  
 161 decreased with the increase of APTES content, indicating that the increase of  
 162 hydrophilic microparticles coating was conducive to the chemical stability of the  
 163 membrane. In addition, we tested the UOCA and the decrease ratio of UOCA of each  
 164 membrane after immersed in alkaline aqueous solution (pH=13) for 7 days to give the  
 165 more powerful proof of the more stable underwater high oleophobic properties of WPM  
 166 MFs. The results indicated that when the soaking time increased, the values of the  
 167 original and PCA/AP MFs would decrease more and the decrease ratio was larger,  
 168 showing they cannot be used in long-term oil/water separation. While, WPM MFs still  
 169 retained high underwater oleophobic properties, especially UOCA of WPM II MF  
 170 maintained above 160 ° and possessed stable underwater superoleophobicity property.  
 171

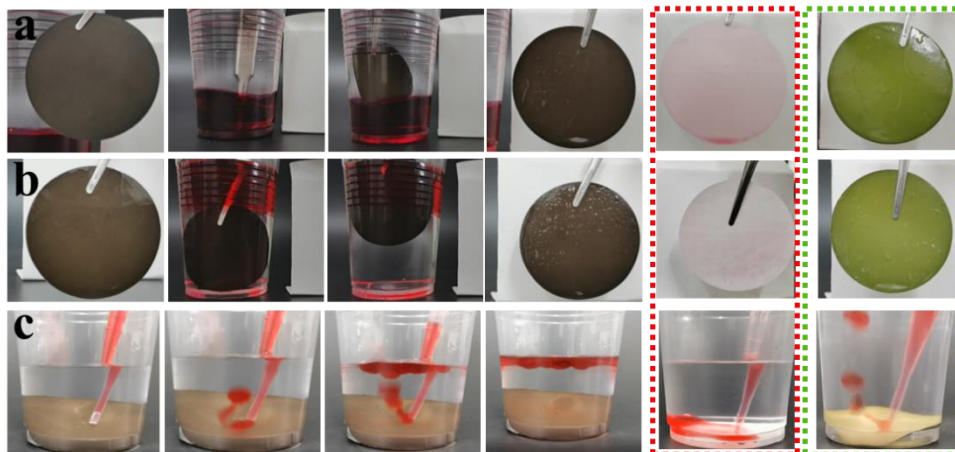

172  
 173 **Supplemental Figure 20** | Anti-low viscous oil fouling performance of the pristine,  
 174 PCA/AP1.6 and WPM II MF. **(a)** The heavy oil fouling resistance; **(b, c)** The light oil  
 175 fouling resistance. All oils are dyed red.

176

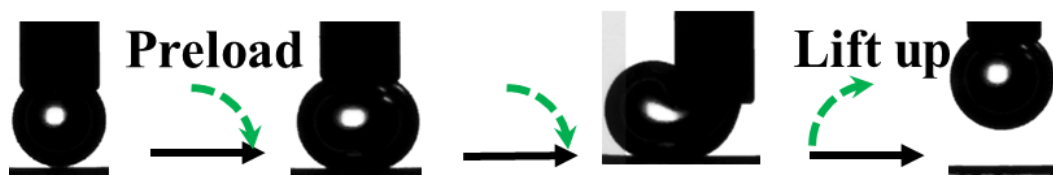

177

178 **Supplemental Figure 21** | Underwater oil adhesion process on WPM II MF.

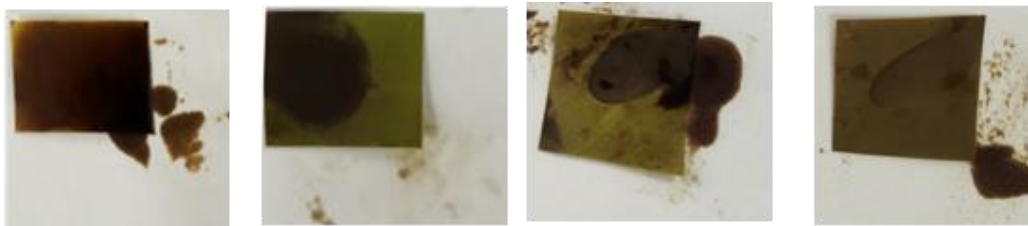

**Pristine MF PCA/AP1.6 MF WPM 0 MF WPM I MF**

179

180

**Supplemental Figure 22** | Anti- dilute crude oil fouling performance of the

181

membranes.

182

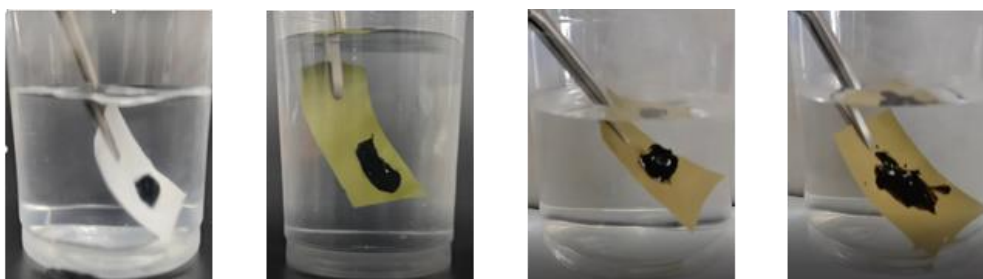

**Pristine MF PCA/AP1.6 MF WPM 0 MF WPM I MF**

183

184

**Supplemental Figure 23** | Anti- dilute crude oil fouling performance of the

185

membranes.

186

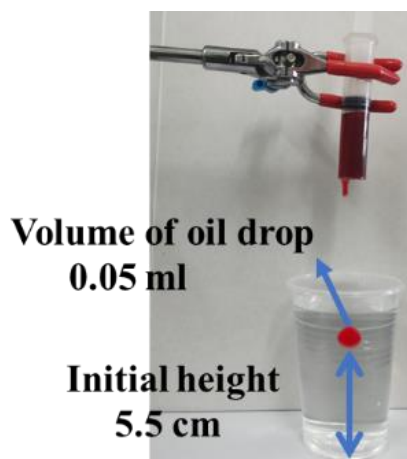

187

188

**Supplemental Figure 24** | Schematic of Free-falling experiment.

189

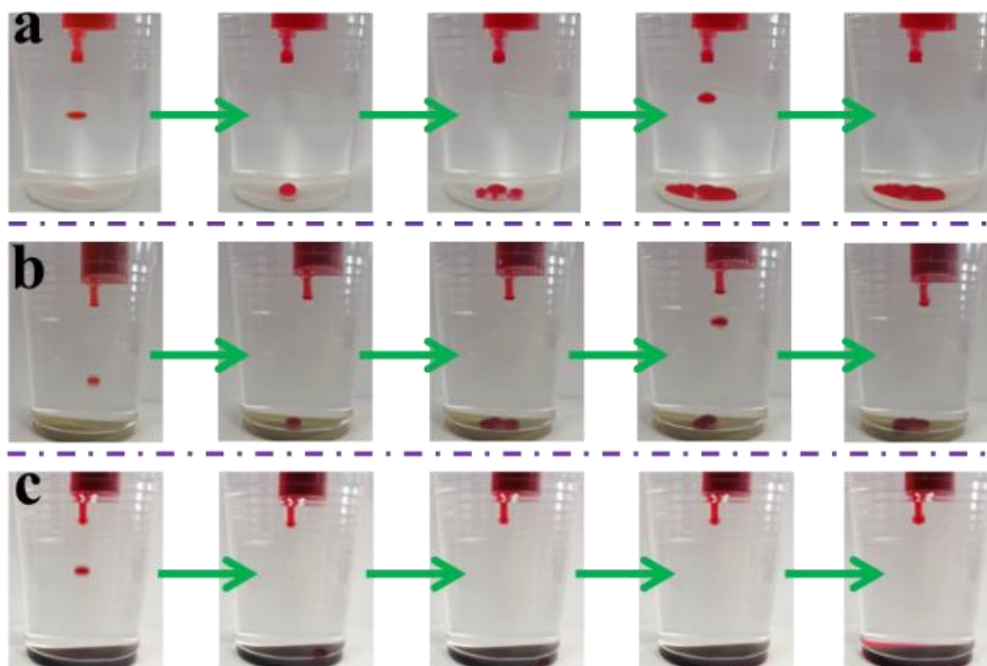

190

191 **Supplemental Figure 25**| Free-falling experiment of oil droplets in water on **(a)** The  
 192 pristine; **(b)** WPM 0; **(c)** WPM II MF.

193 We tested the free-falling experiment for each membrane. After oil droplet fell on the  
 194 surface of the pristine MF, it firmly adhered to the placement, and not fell off even if  
 195 shaken violently. The oil droplets rolled from the falling point to other positions of the  
 196 surface of PCA/AP MFs, WPM 0 MF and WPM I MF finally stop at a certain position  
 197 on the membrane surface. However, oil drops immediately bounced up like a ball after  
 198 touched WPM II MF surface, then slipped into the water after touching the membrane  
 199 surface again. The results illustrated different from other non-migratory foulant, oil  
 200 fouling not only contaminated the impact point, but migrated or amalgamated at other  
 201 positions on the membrane surface, thus improving the resistance to oil fouling was  
 202 more challenging. Also, the different trajectories of oil droplets contacting the surfaces  
 203 of WPM 0 and WPM II MF indicated that their anti-oil-fouling mechanisms were  
 204 different.

205

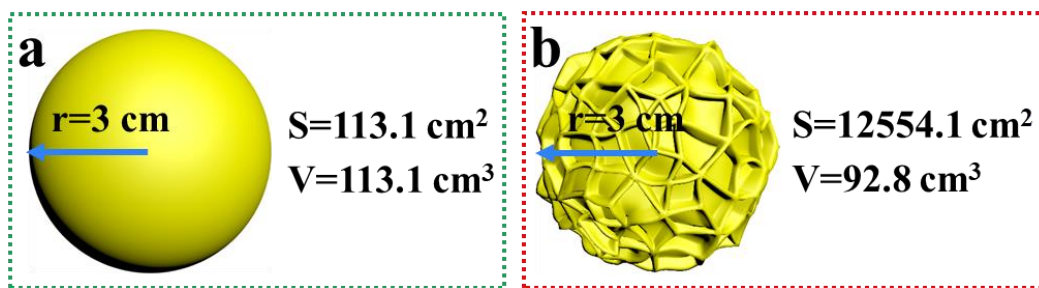

206

207 **Supplemental Figure 26** | The surface area and volume of the smooth microparticles

208 (a, PCA/AP1.6) and the corresponding microparticles with wrinkled patterns (b,

209 WPM II) were calculated by simulation.

210

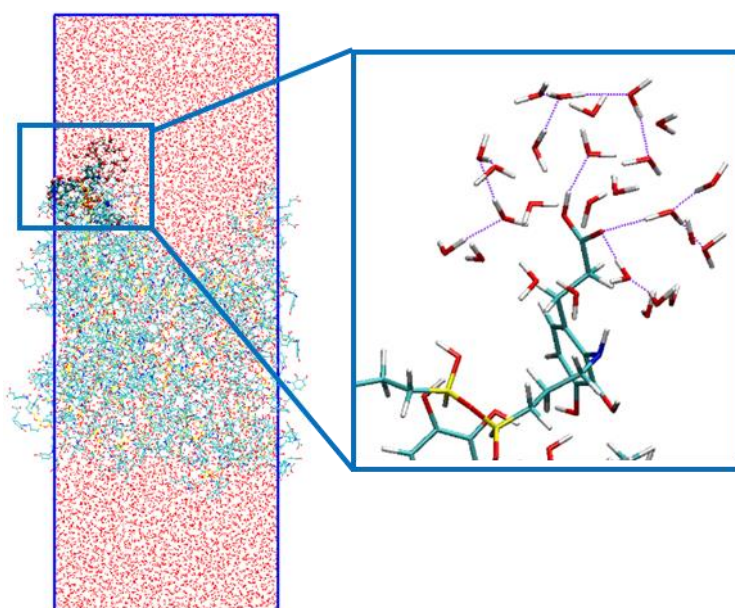

211

212 **Supplemental Figure 27** | Structure of PCA/AP1.6 MF/water molecular with enhanced

213 hydrogen bonds formed between membranes and hydration layer water.

214



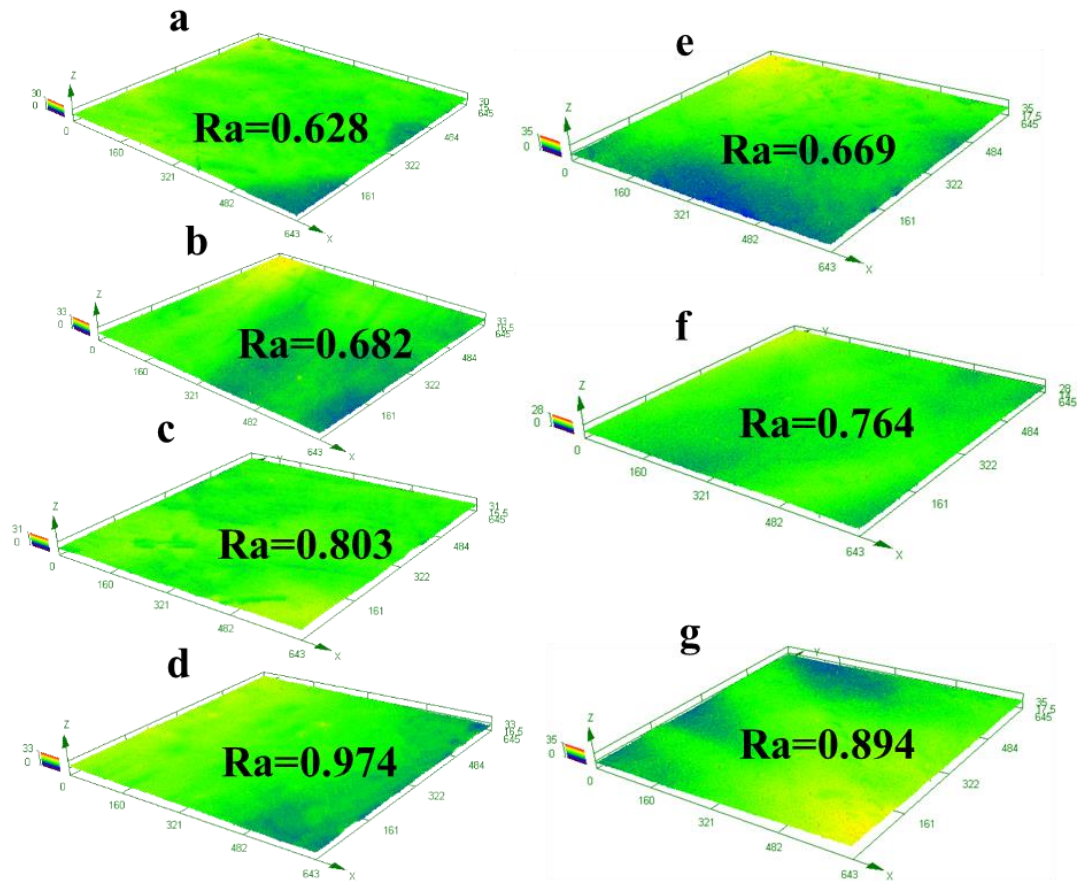

215

216 **Supplementary Figure 28** | CLSM images of (a) the pristine; (b) PCA/AP0.4; (c)  
 217 PCA/AP0.8; (d) PCA/AP1.6; (e) WPM 0; (f) WPM I; (g) WPM II MF.

218 The surface roughness of the WPM 0 MF ( $R_a=0.669 \mu\text{m}$ ) increased by 6.6% compared  
 219 to that of the pristine MF ( $R_a=0.628 \mu\text{m}$ ) and decreased by 1.9% compared to that of  
 220 the PCA/AP0.4 MF ( $R_a=0.682 \mu\text{m}$ ). The surface roughness of WPM I MF ( $R_a=0.764$   
 221  $\mu\text{m}$ ) increased 25% than that of the pristine MF and decreased 4.9% than that of  
 222 PCA/AP0.8 MF ( $R_a=0.803 \mu\text{m}$ ), respectively. Besides, the roughness of WPM II MF  
 223 ( $R_a=0.894 \mu\text{m}$ ) was 8.2% lower than that of PCA/AP1.6 MF ( $R_a=0.974 \mu\text{m}$ ) and 42%  
 224 higher than that of the pristine MF. The largest size of PCA/AP1.6 microparticles  
 225 caused the average distance between the contour peak line and the membrane surface  
 226 became higher after coating on the membrane surface, resulting in the maximum  
 227 roughness. While, the wrinkling formed by WPM microparticles would reduce the  
 228 average distance between the microparticles surface contour and the membrane surface  
 229 and then the roughness of WPM MFs declined.

230

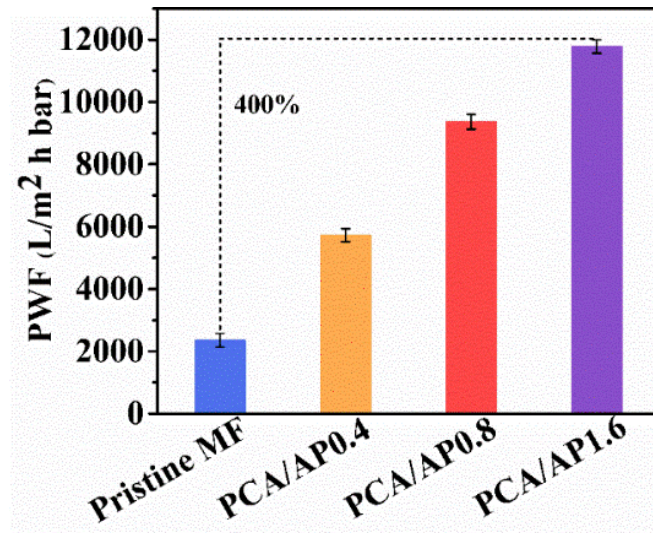

231

232 **Supplementary Figure 29** | The pure water flux of different membranes.

233 The PWF of WPM I MF reached 12522 L m<sup>-2</sup> h<sup>-1</sup> bar, a 510% and 350% improvement  
 234 when compared to commercial pristine and PCA/AP0.8 MF. The PWF of WPM 0 MF  
 235 reached 7800 L m<sup>-2</sup> h<sup>-1</sup> bar, a 290% and 270% improvement when compared to  
 236 commercial pristine and PCA/AP0.4 MF (see Supplementary Fig. 29).

237

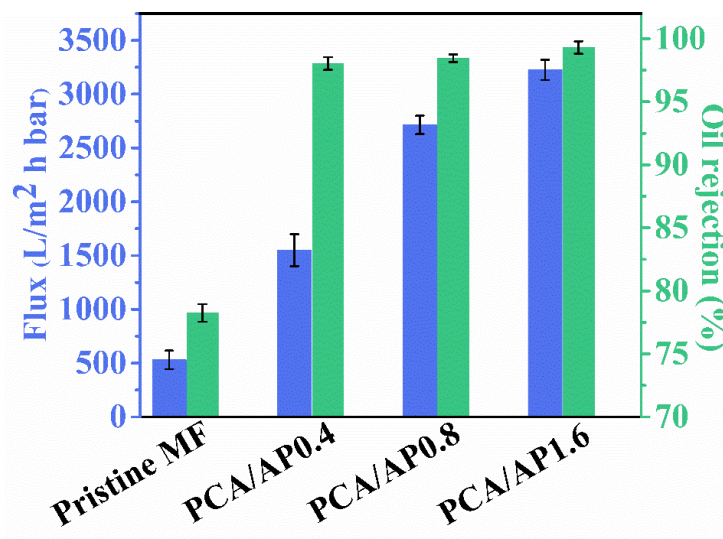

238

239 **Supplementary Figure 30** | The filtration flux and oil rejection of different membranes.

240

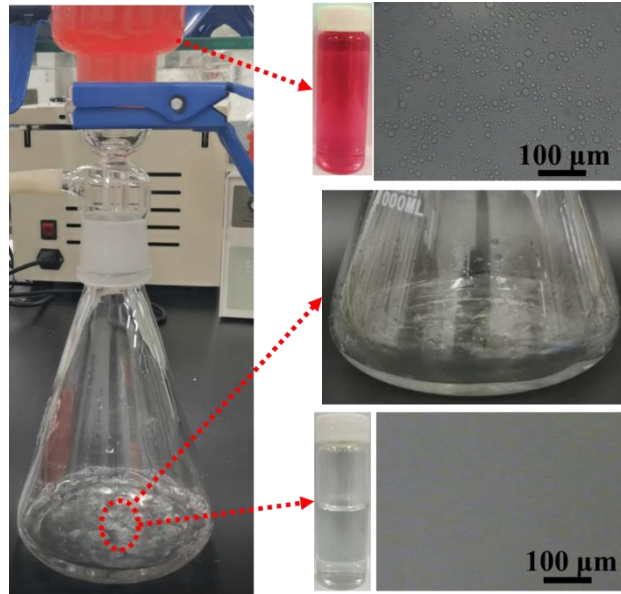

241

242 **Supplementary Figure 31** | The photographs of filtration process and optical  
 243 microscope images of T/W emulsion before and after filtration

244

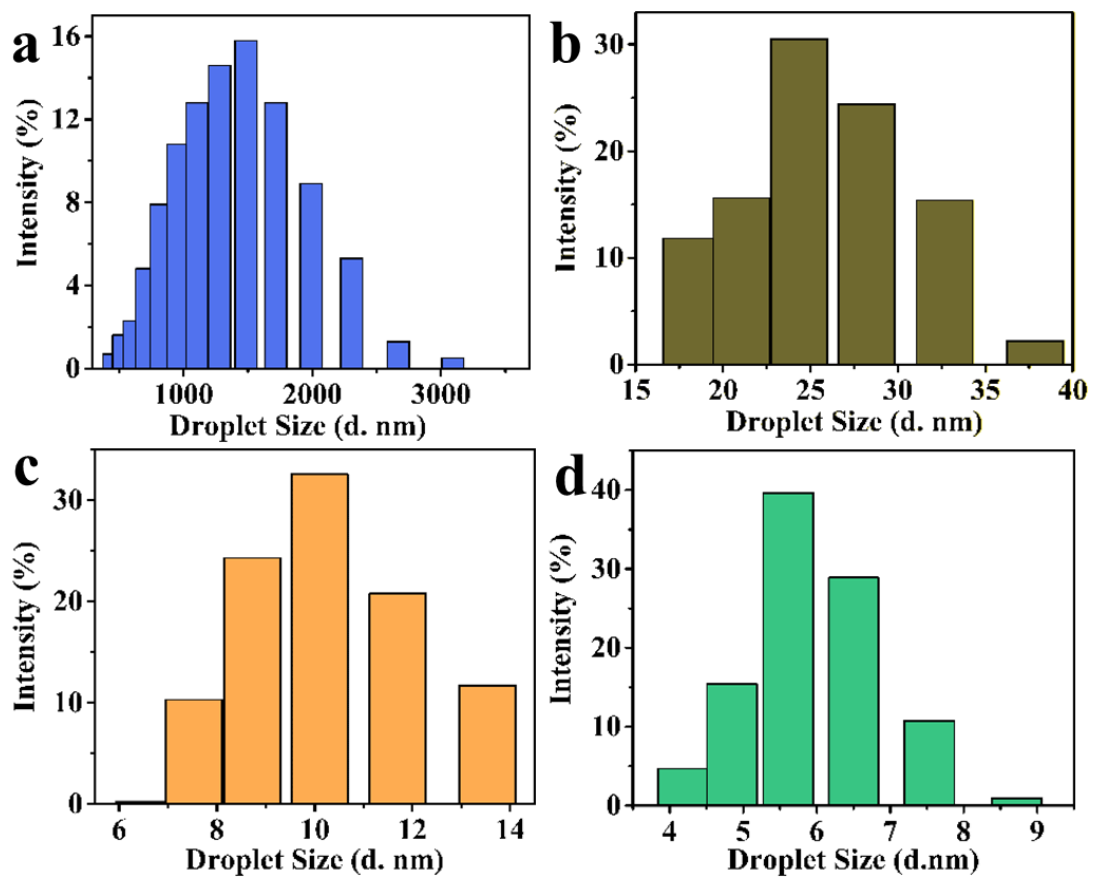

245

246 **Supplementary Figure 32** | (a) The oil drops in the feed of T/W emulsion before  
 247 separation; (b-d) The oil drops in the filtration after T/W emulsion separation of WPM  
 248 0, WPM I, WPM II MF.

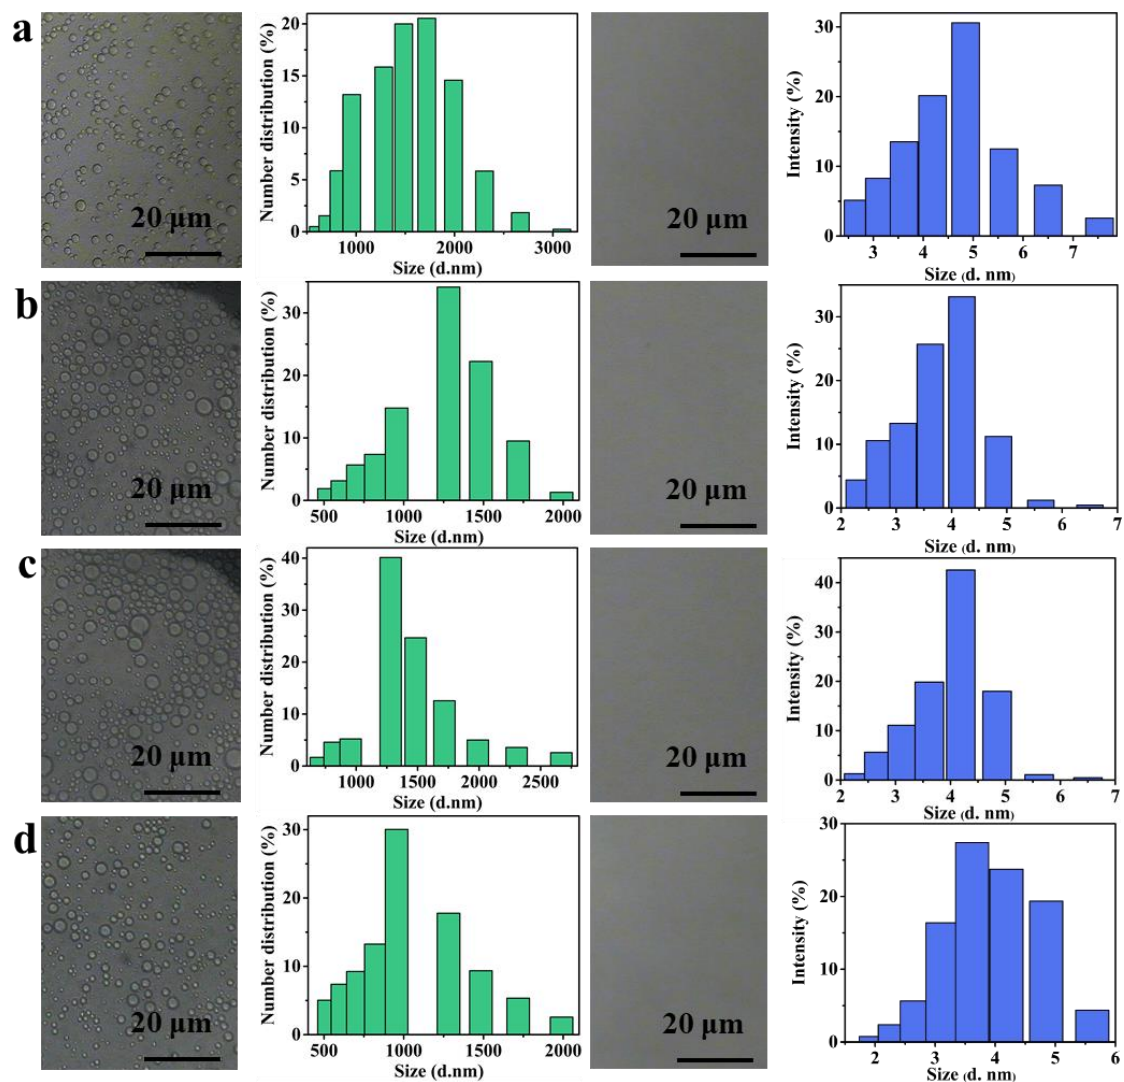

250

251 **Supplementary Figure 33** | The microscopic images and the oil drops in the feed/  
 252 filtration of /W emulsion of WPM II MF. (a) D/W; (b) P/W; (c) Si/W; (d) H/W.

253 The O/W emulsion before filtration was deep pink with a particle size of about 1500  
 254 nm, by contrast, the filtrate was almost transparent with no droplets, which was further  
 255 confirmed by optical microscopy (see Supplementary Figs. 31-33). After WPM 0 and  
 256 WPM I membrane filtration, more than 10 nm oil droplets still penetrated the membrane,  
 257 but no 10 nm oil droplets permeated across the WPM II MF, indicating that the WPM  
 258 II MF had the optimal O/W separation performance. Then we tested the separation  
 259 performance of WPM II MF for different O/W emulsions, and it can be seen that the  
 260 particle size of the emulsion in the filtrate filtered by the membrane can reach less than  
 261 5 nm.

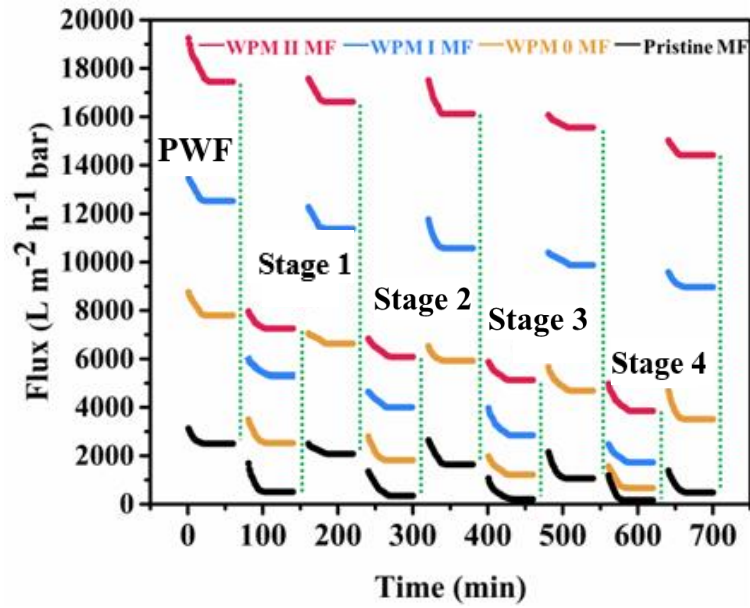

263

264 **Supplementary Figure 34** | The separation performance of membranes during four-  
 265 cycles emulsion separation.

266

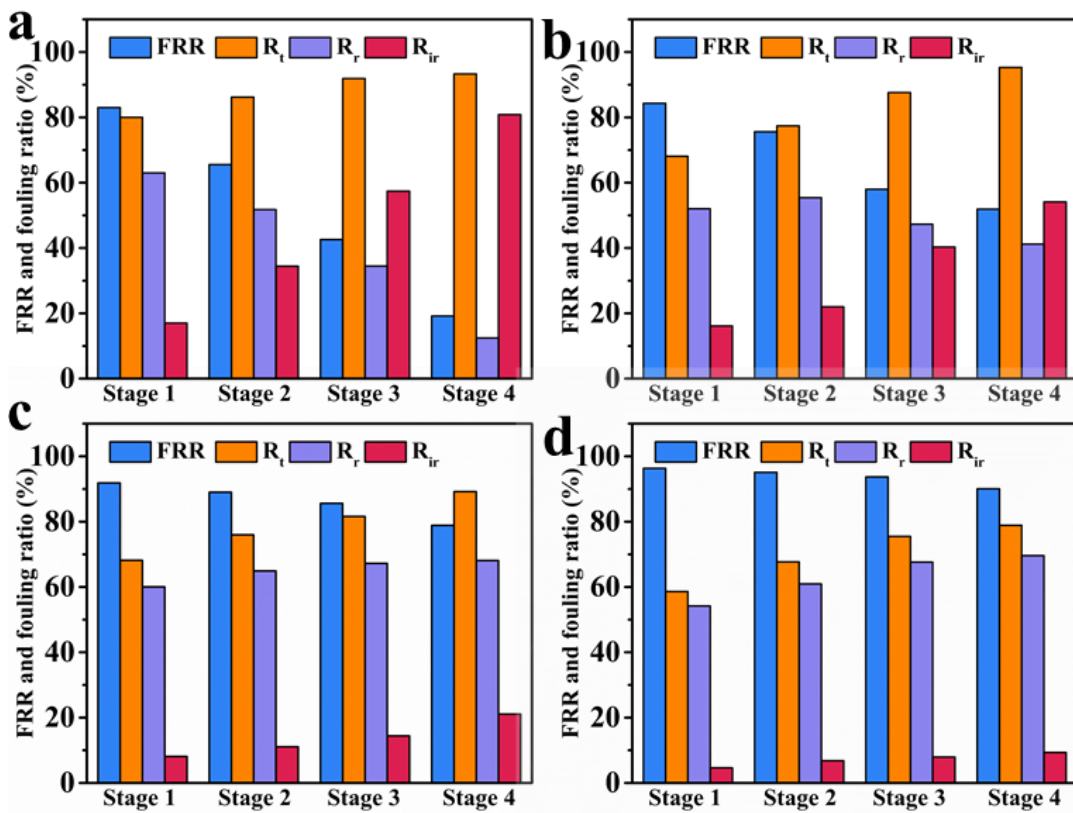

267

268 **Supplementary Figure 35** | FRR, R<sub>t</sub>, R<sub>r</sub>, R<sub>ir</sub> values of (a) Pristine; (b)  
 269 WPM I; (d) WPM II MF during four-cycles emulsion separation.

270

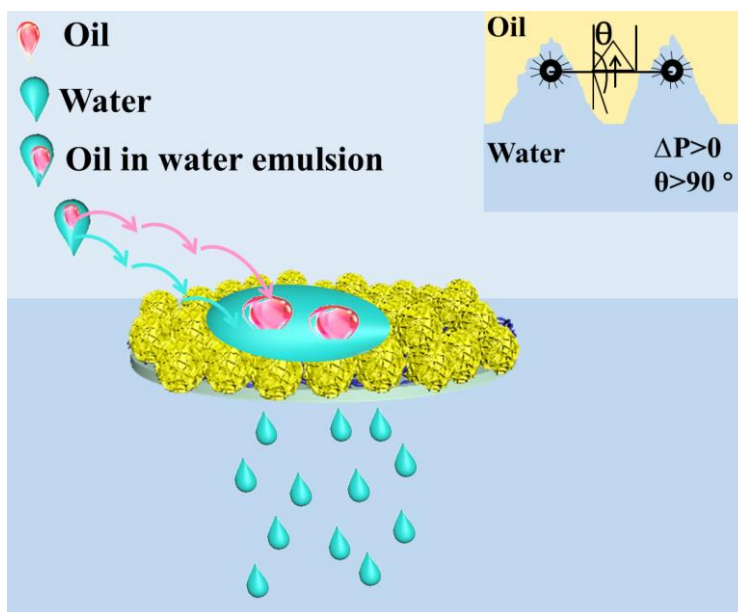

271

272 **Supplementary Figure 36**| Schematic of demulsification mechanism of WPM II MF

273 for crude-oil/water separation.

274

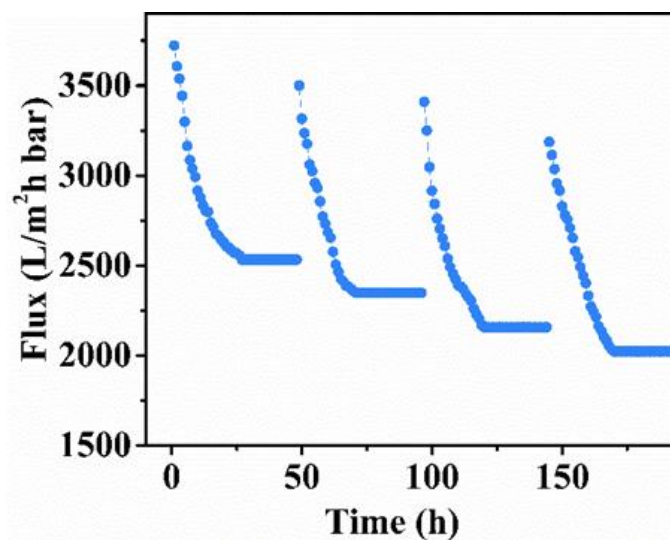

275

276 **Supplementary Figure 37**| Separation performance of viscous crude oil/water

277 mixture of WPM II MF under 1 bar.

278

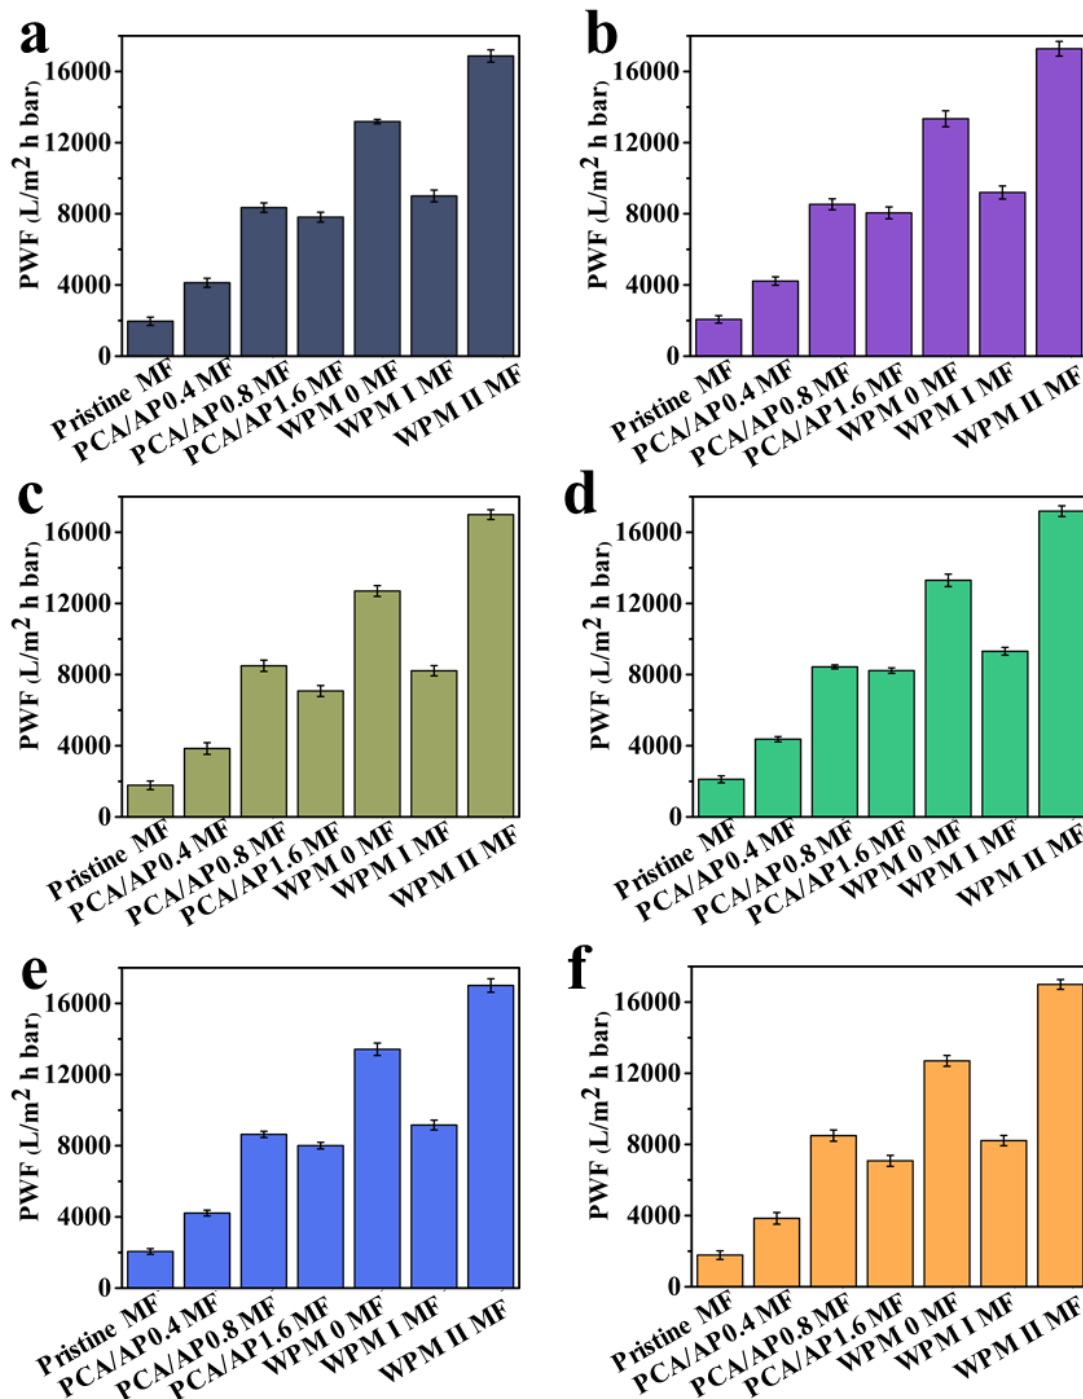

279

280 **Supplementary Figure 38** | The pure water flux of different membranes after immersed  
 281 in acidic, alkaline aqueous solution or saline solution for 24 h. (a) pH=2; (b) pH=4; (c)  
 282 NaCl 10 mg/ml; (d) NaCl 30 mg/ml; (e) pH=11; (f) pH=13.

283

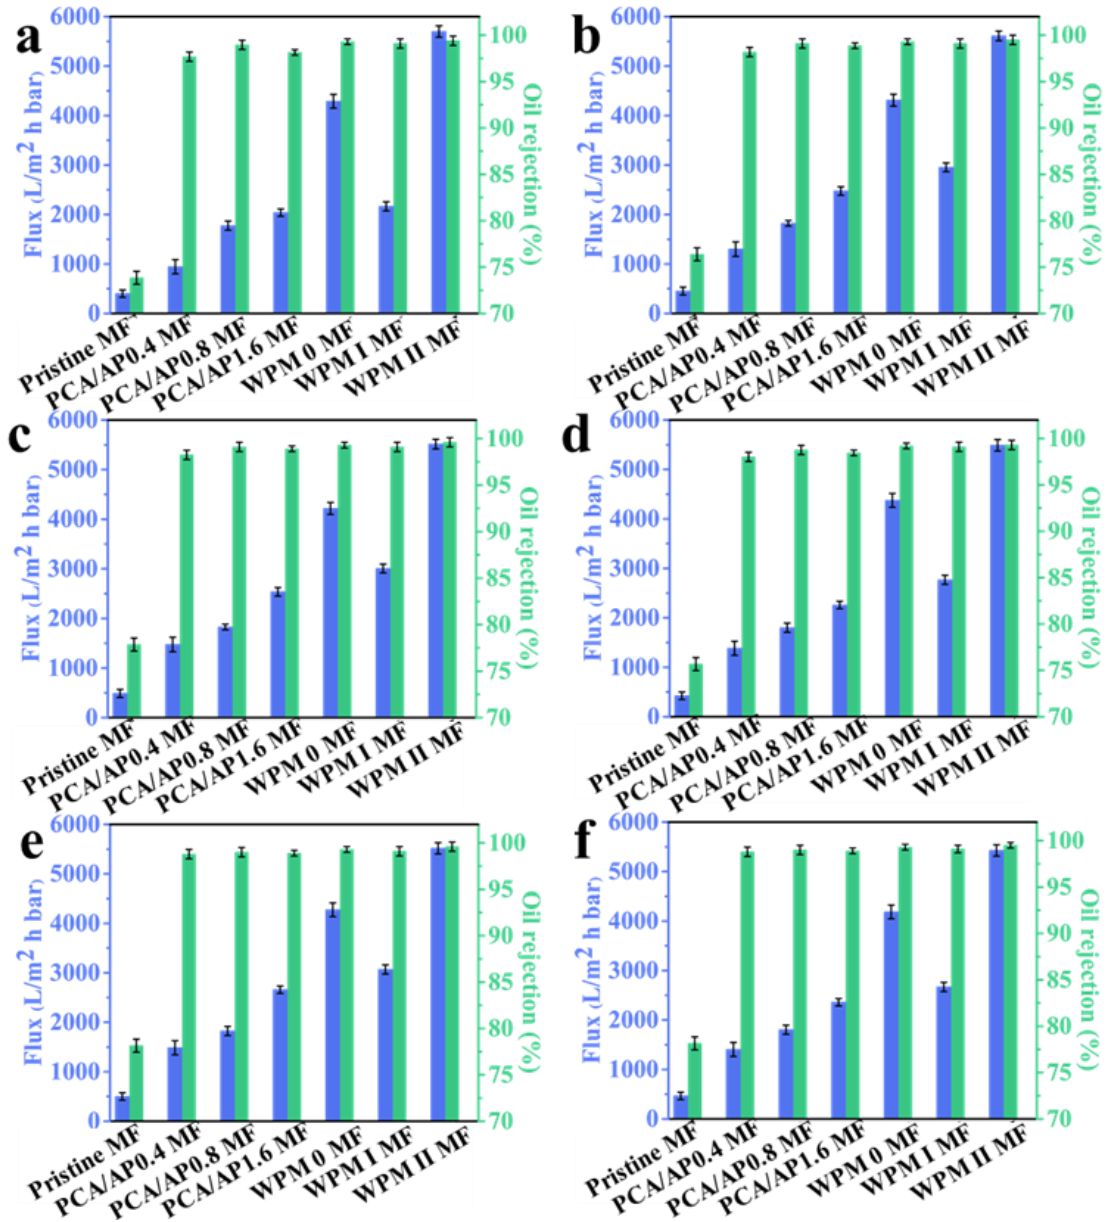

284

285 **Supplementary Figure 39** | The filtration flux and oil rejection of different membranes  
 286 after immersed in acidic, alkaline aqueous solution or saline solution for 24 h. **(a)** pH=2;  
 287 **(b)** pH=4; **(c)** NaCl 10 mg/ml; **(d)** NaCl 30 mg/ml; **(e)** pH=11; **(f)** pH=13.

288 Afterwards, we examined the stability of the pure water flux and the separation  
 289 performance of all the membranes under the acid, base or saline solution environment,  
 290 and the results illustrated that the separation performance of membranes modified by  
 291 only APTES decreased sharply, and membranes after introduction Fe ions still had high  
 292 flux and precise separation performance in acid, base or salt environments.

293



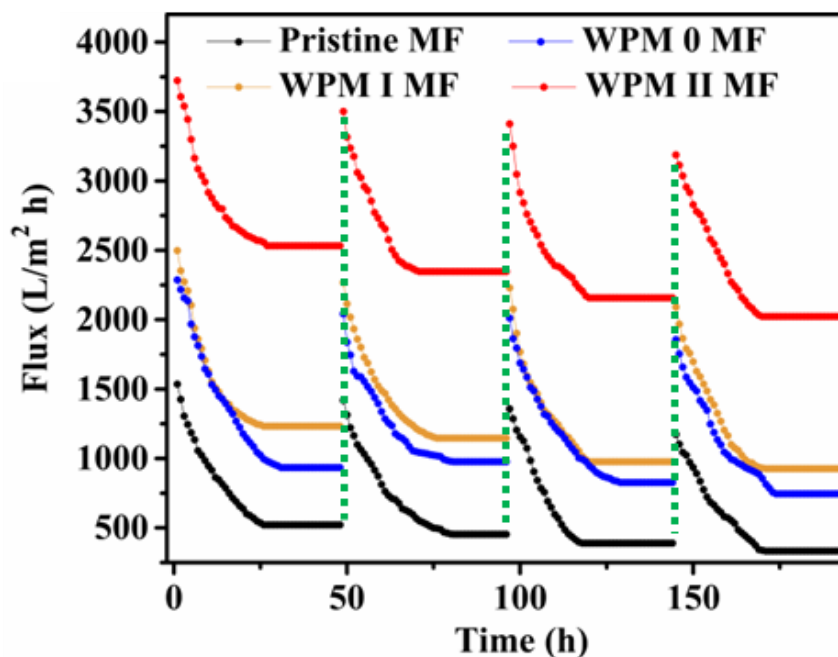

294

295 **Supplementary Figure 40**| Long-term water flux of WPM II MF.

296 Maintaining the long-term separation performance of the membrane is a key factor in  
 297 determining its practical application. Thus, we tested the flux of WPM II MF to evaluate  
 298 long-term operation stability within 190 h for C/W emulsion separation under 1 bar of  
 299 cross-flow filtration. The flux of WPM II MF in Supplementary Fig. 40 showed the  
 300 separation flux still maintained above 2000 L m<sup>-2</sup> h<sup>-1</sup> bar after 190 hours of operation,  
 301 which had a well long-term operation stability under cross-flow filtration mode,  
 302 illustrating WPM II MF has potential application in oily wastewater treatment.

303

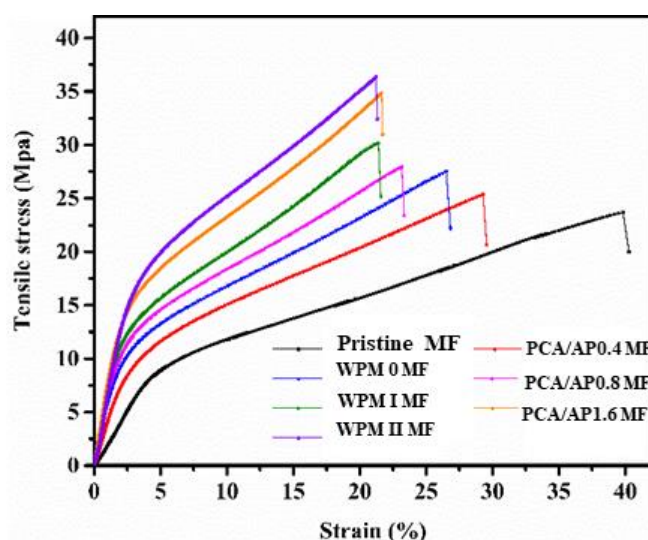

304

305 **Supplementary Figure 41**| Mechanical properties using tensile tests of membranes.

306

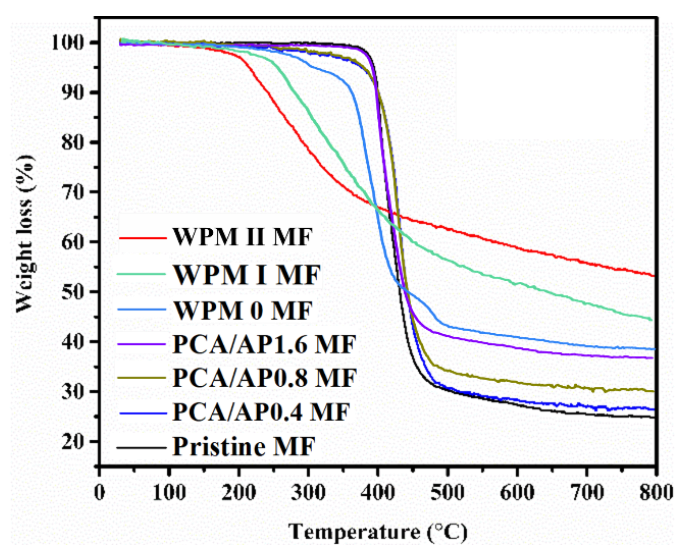

307

308 **Supplementary Figure 42**| TGA of membranes.

309 **Supplementary Table 1**| The detailed modification conditions and abbreviations of the  
 310 membranes.

| Membranes    | CA (g) | APTES<br>(g) | FeCl <sub>3</sub><br>(mg/ml) | Reaction<br>Time (h) | Temperature<br>(°C) |
|--------------|--------|--------------|------------------------------|----------------------|---------------------|
| Pristine MF  | 0      | 0            | 0                            | 12                   | 25                  |
| PCA/AP0.4 MF | 0.2    | 0.4          | 0                            | 12                   | 25                  |
| WPM 0 MF     | 0.2    | 0.4          | 100                          | 12                   | 25                  |
| PCA/AP0.8 MF | 0.2    | 0.8          | 0                            | 12                   | 25                  |
| WPM I MF     | 0.2    | 0.8          | 100                          | 12                   | 25                  |
| PCA/AP1.6 MF | 0.2    | 1.6          | 0                            | 12                   | 25                  |
| WPM II MF    | 0.2    | 1.6          | 100                          | 12                   | 25                  |

311

312 **Supplementary Table 2**| Summary of the DFT simulation results.

| System               | Binding<br>energy<br>(kJ/mol) | E <sub>complex</sub><br>(kJ/mol) | E <sub>fragment1</sub><br>(kJ/mol) | E <sub>fragment2</sub><br>(kJ/mol) |
|----------------------|-------------------------------|----------------------------------|------------------------------------|------------------------------------|
| Fe <sup>3+</sup> -OH | -151.79                       | -3049.642                        | -1786.377                          | -1263.208                          |

|                        |         |           |           |           |
|------------------------|---------|-----------|-----------|-----------|
| Fe <sup>3+</sup> -NH   | -221.93 | -3049.663 | -1786.371 | -1263.208 |
| Fe <sup>3+</sup> -COOH | -217.48 | -3049.666 | -1786.375 | -1263.208 |

313

314 **Supplementary Table 3** | Surface elemental analysis of the membranes from the XPS  
315 spectra.

| Samples      | Elemental and Area/% |             |             |             |              |               |
|--------------|----------------------|-------------|-------------|-------------|--------------|---------------|
|              | C <i>1s</i>          | N <i>1s</i> | F <i>1s</i> | O <i>1s</i> | Si <i>2p</i> | Fe <i>2p3</i> |
| Pristine MF  | 59.11                | 1.77        | 34.72       | 4.05        | 0.35         | 0             |
| PCA/AP0.4 MF | 60.58                | 5.28        | 1.39        | 23.06       | 9.7          | 0             |
| WPM 0 MF     | 63.19                | 4.4         | 2.18        | 22.4        | 7.42         | 0.41          |
| PCA/AP0.8 MF | 57.78                | 6.91        | 1.53        | 22.75       | 11.02        | 0             |
| WPM IMF      | 59.23                | 4.29        | 2.17        | 25.55       | 6.18         | 2.58          |
| PCA/AP1.6 MF | 57.23                | 6.85        | 2.94        | 21.34       | 11.65        | 0             |
| WPM IIMF     | 55.24                | 3.74        | 1.23        | 30.38       | 5.64         | 3.78          |

316

317 **Supplementary Table 4** | XPS results of all membranes.

| Samples         | Elemental<br>and<br>Atomic<br>/% | POS.   | Peak<br>attribution | Area/% | Molar<br>fraction/% |
|-----------------|----------------------------------|--------|---------------------|--------|---------------------|
| Pristine MF     | C <i>1s</i>                      | 283.54 | C-C                 | 51.98  | 30.73               |
|                 | (59.11)                          | 285.46 | C-O                 | 45.11  | 26.66               |
|                 |                                  | 291.08 | C-F                 | 2.91   | 1.72                |
| Pristine MF     | O <i>1s</i>                      | 530.27 | C-O                 | 100    | 4.05                |
|                 | (4.05)                           |        |                     |        |                     |
| Pristine MF     | N <i>1s</i>                      | 400.81 | N-H                 | 100    | 1.77                |
|                 | (1.77)                           |        |                     |        |                     |
| PCA/AP0.4<br>MF | C <i>1s</i>                      | 284.60 | C-C/C=C             | 17.12  | 10.37               |
|                 | (60.58)                          | 287.88 | C-O                 | 14.91  | 9.03                |

|           |                   |        |         |       |       |
|-----------|-------------------|--------|---------|-------|-------|
|           |                   | 290.84 | C-F     | 12.02 | 7.28  |
|           |                   | 283.86 | C-Si    | 15.39 | 9.32  |
|           |                   | 287.88 | C=O     | 13.58 | 8.23  |
|           |                   | 286.24 | C=N     | 13.86 | 8.40  |
|           |                   | 285.76 | C-N     | 13.13 | 7.95  |
|           | O <i>1s</i>       | 533.48 | -OH     | 58.04 | 13.38 |
|           | (23.06)           | 530.67 | -O-C    | 25.42 | 5.86  |
|           |                   | 529.38 | O=C     | 16.54 | 3.81  |
|           | N <i>1s</i>       | 401.32 | N-H     | 55.88 | 2.95  |
|           | (5.28)            | 399.38 | N=C     | 44.12 | 2.33  |
| WPM 0     | C <i>1s</i>       | 291.07 | C-F     | 0.12  | 0.08  |
| MF        | (63.19)           | 287.85 | C=O     | 6.55  | 4.14  |
|           |                   | 286.21 | C=N     | 22.44 | 14.18 |
|           |                   | 285.35 | C-N     | 22.32 | 14.11 |
|           |                   | 284.81 | C-O     | 17.93 | 11.33 |
|           |                   | 284.31 | C=C/C-C | 22.28 | 14.08 |
|           |                   | 283.84 | C-Si    | 8.35  | 5.28  |
|           | O <i>1s</i>       | 533.36 | -O-C    | 13.12 | 2.94  |
|           | (22.4)            | 532.69 | O=C     | 34.80 | 7.8   |
|           |                   | 531.97 | -OH     | 17.16 | 3.84  |
|           |                   | 531.06 | O-Fe    | 34.92 | 7.82  |
|           | N <i>1s</i> (4.4) | 401.61 | N-H     | 50.25 | 2.21  |
|           |                   | 399.50 | N=C     | 39.74 | 1.75  |
|           |                   | 395.61 | N-Fe    | 10.01 | 0.44  |
| PCA/AP0.8 | C <i>1s</i>       | 291.36 | C-F     | 2.33  | 1.35  |
| MF        | (57.78)           | 287.76 | C=O     | 8.08  | 4.67  |
|           |                   | 286.10 | C=N     | 14.07 | 8.13  |
|           |                   | 285.26 | C-N     | 10.47 | 6.05  |

|           |             |        |         |       |       |
|-----------|-------------|--------|---------|-------|-------|
|           |             | 284.83 | C-O     | 17.95 | 10.37 |
|           |             | 284.22 | C C/C=C | 19.66 | 11.36 |
|           |             | 283.76 | C-Si    | 27.44 | 15.85 |
|           | O <i>1s</i> | 532.72 | -O-C    | 16.84 | 3.83  |
|           | (22.75)     | 531.93 | O=C     | 41.02 | 9.33  |
|           |             | 531.11 | -OH     | 42.15 | 9.59  |
|           | N <i>1s</i> | 401.32 | N-H     | 46.45 | 3.21  |
|           | (6.91)      | 399.38 | N=C     | 53.55 | 3.70  |
| WPM I MF  | C <i>1s</i> | 291.07 | C-F     | 0.12  | 0.08  |
|           | (59.23)     | 287.85 | C=O     | 6.55  | 4.14  |
|           |             | 286.21 | C=N     | 22.44 | 14.18 |
|           |             | 285.35 | C-N     | 22.32 | 14.11 |
|           |             | 284.81 | C-O     | 17.93 | 11.33 |
|           |             | 284.31 | C=C/C-C | 22.28 | 14.08 |
|           |             | 283.84 | C-Si    | 8.35  | 5.28  |
|           | O <i>1s</i> | 529.70 | O-Fe    | 22.95 | 5.86  |
|           | (25.55)     | 530.97 | -OH     | 36.66 | 9.37  |
|           |             | 531.99 | O=C     | 26.34 | 6.73  |
|           |             | 533.05 | -O-C    | 14.04 | 3.59  |
|           | N <i>1s</i> | 401.22 | N-H     | 48.63 | 2.08  |
|           | (4.29)      | 399.00 | N=C     | 34.20 | 1.47  |
|           |             | 399.86 | N-Fe    | 17.18 | 0.74  |
| PCA/AP1.6 | C <i>1s</i> | 290.85 | C-F     | 4.80  | 2.74  |
|           | (57.23)     | 287.96 | C=O     | 11.24 | 6.43  |
|           |             | 286.46 | C=N     | 17.60 | 10.07 |
|           |             | 285.66 | C-N     | 18.18 | 10.41 |
|           |             | 285.00 | C-O     | 20.73 | 11.86 |
|           |             | 284.50 | C=C/C-C | 24.07 | 13.78 |
|           |             | 284.02 | C-Si    | 3.38  | 1.93  |

|        |             |        |         |       |       |
|--------|-------------|--------|---------|-------|-------|
|        | O <i>Is</i> | 532.59 | -O-C    | 24.33 | 5.19  |
|        | (21.34)     | 531.93 | O=C     | 58.30 | 12.44 |
|        |             | 530.74 | -OH     | 17.37 | 3.71  |
|        | N <i>Is</i> | 400.95 | N-H     | 38.77 | 2.66  |
|        | (6.85)      | 399.12 | N=C     | 61.23 | 4.19  |
| WPM II | C <i>Is</i> | 291.08 | C-F     | 0.13  | 0.07  |
| MF     | (55.24)     | 287.73 | C=O     | 5.91  | 3.26  |
|        |             | 286.14 | C=N     | 22.13 | 12.22 |
|        |             | 285.25 | C-N     | 22.01 | 12.16 |
|        |             | 284.71 | C-O     | 18.39 | 10.16 |
|        |             | 284.23 | C=C/C-C | 22.86 | 12.63 |
|        |             | 283.79 | C-Si    | 8.57  | 4.73  |
|        | O <i>Is</i> | 529.33 | O-Fe    | 18.24 | 5.54  |
|        | (30.38)     | 530.61 | -OH     | 33.81 | 10.27 |
|        |             | 531.71 | O=C     | 31.39 | 9.54  |
|        |             | 533.23 | -O-C    | 16.55 | 5.03  |
|        | N <i>Is</i> | 401.21 | N-H     | 33.47 | 1.25  |
|        | (3.74)      | 398.52 | N=C     | 34.86 | 1.30  |
|        |             | 399.58 | N-Fe    | 31.67 | 1.19  |

318

319 **Supplementary Table 5** | The viscosity of various liquids.

| Samples           | Viscosity (mPa·s) | Temperature (°C) |
|-------------------|-------------------|------------------|
| Petroleum ether   | 0.3               | 20               |
| Dichloroethane    | 0.8               | 20               |
| Dilute crude oil  | 44                | 20               |
| Viscous crude oil | 9630              | 20               |

320

321 **Supplementary Table 6**]. Summary of the MD simulation of PCA/AP1.6 and WPM  
 322 II MF, including binding and dissociation energies, diffusion coefficients of hydration  
 323 layer water.

| System       | $\Delta E^+$<br>(kJ/mol) | $\Delta E^-$<br>(kJ/mol) | Diffusion<br>coefficients<br>( $m^2/s$ ) | Residence<br>Time (ps) |
|--------------|--------------------------|--------------------------|------------------------------------------|------------------------|
| PCA/AP1.6 MF | 0.4                      | 2.04                     | 3.84±0.07                                | 4.5                    |
| WPM II MF    | 0.5                      | 3.0                      | 1.95±0.17                                | 8.22                   |

324

325 **Supplementary Table 7**] Polar and disperse components of the liquids.

| Liquids         | Surface-energy components (mN/m) |              |              |
|-----------------|----------------------------------|--------------|--------------|
|                 | $\gamma_l$                       | $\gamma_l^d$ | $\gamma_l^p$ |
| Water           | 72.8                             | 21.8         | 51.0         |
| Ethylene glycol | 48.0                             | 29.0         | 19.0         |

326

327 **Supplementary Table 8**] Surface energy of PCA/AP1.6 and WPM II MF.

| Sample<br>membranes | Contact angle (°) |                    | Surface-energy components (mN/m) |              |              |
|---------------------|-------------------|--------------------|----------------------------------|--------------|--------------|
|                     | Water             | Ethylene<br>glycol | $\gamma_s$                       | $\gamma_s^d$ | $\gamma_s^p$ |
| PCA/AP1.6 MF        | 6                 | 10                 | 84.3                             | 2.5          | 81.8         |
| WPM II MF           | 0                 | 18                 | 88.2                             | 1.5          | 86.8         |

328

329

330 **Supplementary Table 9**] O/W emulsion separation permeance information of WPM II  
 331 MF and high-performance membranes reported in open literatures<sup>2-28</sup>.

| Membrane | Modificati<br>on strategy | Model<br>oil | Surfact<br>ant | Pure<br>water<br>flux | Permeab<br>ility<br>( $L \cdot m^{-2}$ | Oil<br>rejectio<br>n (%) | Trans-<br>memb<br>rane | Referen<br>ce |
|----------|---------------------------|--------------|----------------|-----------------------|----------------------------------------|--------------------------|------------------------|---------------|
|----------|---------------------------|--------------|----------------|-----------------------|----------------------------------------|--------------------------|------------------------|---------------|

|                                     |                   |               |             | h-1)      | pressu<br>re<br>(bar) |      |      |    |
|-------------------------------------|-------------------|---------------|-------------|-----------|-----------------------|------|------|----|
| PVDF/TA-<br>PEI/Ti <sup>4+</sup>    | Coating           | Pump oil      | SDS         | 6736      | 3139                  | 99.9 | 0.5  | 2  |
| PVDF-<br>PG/PEI                     | Coating           | Toluene       | SDS         | 1333      | 1053                  | 98.4 | 0.1  | 3  |
| PA@PEI/P<br>VDF                     | Coating           | Toluene       | Tween<br>80 | /         | 1343                  | 99.1 | 0.15 | 4  |
| Janus<br>PVDF                       | Pray-<br>coating  | Toluene       | Tween<br>80 | /         | 2060                  | 94   | 1    | 5  |
| HNTs@PV<br>DF@PDA/<br>PSBMA         | Coating           | Soybean<br>oi | SDS         | /         | 2365                  | 99.8 | 0.85 | 6  |
| UF-T/C                              | Coating           | Toluene       | Tween<br>80 | 7900      | 2000                  | 99.5 | 0.9  | 7  |
| CNT@PD<br>A-ZT                      | Nano-<br>assembly | n-<br>Hexane  | SDS         | 3360      | 1880                  | 99.6 | 0.5  | 8  |
| MF-DA/TA                            | Coating           | Toluene       | Tween<br>80 | 1350<br>0 | 2100                  | 99.6 | 0.09 | 9  |
| GO/LDH                              | LBL               | Decane        |             |           | 1900                  | 93   | 1    | 10 |
| Cu <sup>2+</sup> /alginat<br>e/PVDF | Coating           | Crude oil     | SDS         | 1600      | 1230                  | 99.8 | 1    | 11 |
| PP/PDA-<br>PVP                      | Coating           | SO            | DC193       | 440       | 268                   | 98   | 1    | 12 |
| PVDF/CS&<br>DA                      | Coating           | PO            | SDS         | 201       | 171                   | 99.7 | 0.1  | 13 |
| GA-<br>APTES/PV                     | Coating           | Toluene       | Tween<br>80 | 1027<br>3 | 1000                  | 99.5 | 0.9  | 14 |



|                      |          |           |       |      |       |       |     |    |
|----------------------|----------|-----------|-------|------|-------|-------|-----|----|
| DF                   |          |           |       |      |       |       |     |    |
| PK-g-                | Coating  | Toluene   | SDS   | 1820 | 1710  | 99.7  | 1   | 15 |
| PSBMA                |          |           |       |      |       |       |     |    |
| SWCNT/P              | Nano-    | Industria | Tween | 7270 | 6060  | 99.99 | 0.5 | 16 |
| D/PEI                | assembly | l oil     | 80    |      |       |       |     |    |
| Pal coated           | Coating  | kerosene  | Tween | /    | 477.7 | 99.6  | 0.8 | 17 |
| membrane             |          |           | 80    |      |       |       |     |    |
| PVDF-TA-             | Coating  | Glycerol  | SDS   | 2250 | 1800  | 99    | 0.6 | 18 |
| SP                   |          |           |       |      |       |       |     |    |
| loess-               | Coating  | Petroleu  | Tween | 7000 | 910.4 | 99.6  | 1   | 19 |
| coated               |          | m ether   | 80    |      |       |       |     |    |
| PVDF                 |          |           |       |      |       |       |     |    |
| PVDF@pD              | Coating  | Dichloro  | Tween | /    | 572   | 98    | 0.8 | 20 |
| A@SiO <sub>2</sub>   |          | methane   | 80    |      |       |       |     |    |
| MF-T/K               | Coating  | Toluene   | Tween | /    | 2580  | 99.2  | 1   | 21 |
|                      |          |           | 80    |      |       |       |     |    |
| PVDF-                | Coating  | Toluene   | Tween | 6364 | 2500  | 99.6  | 1   | 22 |
| TAAP                 |          |           | 80    |      |       |       |     |    |
| TA-                  | Coating  | Toluene   | Tween | 1038 | 2650  | 99.7  | 1   | 23 |
| APTES-               |          |           | 20    | 4    |       |       |     |    |
| TEOS                 |          |           |       |      |       |       |     |    |
| TA-                  | Coating  | Toluene   | SDS   | /    | 2200  | 99    | 1   | 24 |
| APTES-Fe             |          |           |       |      |       |       |     |    |
| PVDF-                | Coating  | Toluene   | Tween | 1300 | 2700  | 99.5  | 1   | 25 |
| POSS-                |          |           | 80    | 0    |       |       |     |    |
| NH <sub>2</sub> /FPN |          |           |       |      |       |       |     |    |
| MF-C/A               | Coating  | Toluene   | Tween | 1300 | 1300  | 99    | 1   | 26 |
|                      |          |           | 80    | 0    |       |       |     |    |
| Coating-             | Coating  | Toluene   | /     | /    | 2750  | 99    | 1   | 27 |

---

deposited

copper

mesh

|            |                      |                     |             |             |      |      |      |              |
|------------|----------------------|---------------------|-------------|-------------|------|------|------|--------------|
| chitin NFs | Vacuum-<br>filtering | Toluene             | Tween<br>80 | 2630        | 563  | 91   | 0.95 | 28           |
| WPM II     | Coating              | Petroleu<br>m ether | Tween<br>80 | 1755<br>5.5 | 5635 | 99.6 | 1    | This<br>work |

---

332

333 **Supplementary Table 10** | Mechanical properties of different membranes.

---

| Ionomer      | E/MPa | TS/MPa | $\epsilon$ /% |
|--------------|-------|--------|---------------|
| Pristine MF  | 1.53  | 23.72  | 39.87         |
| PCA/AP0.4 MF | 3.17  | 25.5   | 29.29         |
| WPM 0 MF     | 5.63  | 27.52  | 26.57         |
| PCA/AP0.8 MF | 5.92  | 27.95  | 23.13         |
| WPM I MF     | 6.81  | 30.25  | 21.5          |
| PCA/AP1.6 MF | 6.66  | 34.93  | 21.72         |
| WPM II MF    | 7.69  | 36.47  | 21.31         |

---

334

335 **Reference**

336 1. Ohno, S., Hori, W., Hosokawa, M., Tatsuzawa, F. & Doi, M. Post-transcriptional silencing of chalcone  
337 synthase is involved in phenotypic lability in petals and leaves of bicolor dahlia (*Dahlia variabilis*) 'Yuino'.  
338 *Planta* **247**, 413-428 (2018).

339 2. Zhao, X. *et al.* Engineering superwetting membranes through polyphenol-polycation-metal  
340 complexation for high-efficient oil/water separation: From polyphenol to tailored nanostructures. *J.*  
341 *Membr. Sci.* **630**, 119310 (2021).

342 3. Zuo, C. *et al.* Co-deposition of pyrogallol/polyethyleneimine on polymer membranes for highly  
343 efficient treatment of oil-in-water emulsion. *Sep. Pur. Tech.* **267**, 118660 (2021).

344 4. Zeng, X. *et al.* Fabrication of superhydrophilic PVDF membranes by one-step modification with eco-  
345 friendly phytic acid and polyethyleneimine complex for oil-in-water emulsions separation. *Chemosphere*

346 **264**, 128395 (2021).

347 5. Zuo, J.-H. *et al.* Janus polyvinylidene fluoride membranes fabricated with thermally induced phase  
348 separation and spray-coating technique for the separations of both W/O and O/W emulsions. *J. Membr.*  
349 *Sci.* **595**, 117475 (2020).

350 6. Zhou, Y. *et al.* A modified TA-APTES coating: Endowing porous membranes with uniform, durable  
351 superhydrophilicity and outstanding anti-crude oil-adhesion property via one-step process. *J. Membr.*  
352 *Sci.* **618**, 118703 (2021).

353 7. Yang, X., Yan, L., Ma, J., Bai, Y. & Shao, L. Bioadhesion-inspired surface engineering constructing robust,  
354 hydrophilic membranes for highly-efficient wastewater remediation. *J. Membr. Sci.* **591**, 117353 (2019).

355 8. Zhao, X. *et al.* Bioinspired synthesis of polyzwitterion/titania functionalized carbon nanotube  
356 membrane with superwetting property for efficient oil-in-water emulsion separation. *J. Membr. Sci.* **589**,  
357 117257 (2019).

358 9. Yang, X., Yan, L., Wu, Y., Liu, Y. & Shao, L. Biomimetic hydrophilization engineering on membrane  
359 surface for highly-efficient water purification. *J. Membr. Sci.* **589**, 117223 (2019).

360 10. Zhao, X., Jia, N., Cheng, L., Liu, L. & Gao, C. Metal-polyphenol coordination networks: Towards  
361 engineering of antifouling hybrid membranes via in situ assembly. *J. Membr. Sci.* **563**, 435-446 (2018).

362 11. Jiang, J. *et al.* Antifouling and antimicrobial polymer membranes based on bioinspired polydopamine  
363 and strong hydrogen-bonded poly(*n*-vinyl pyrrolidone). *ACS Appl. Mater. Inter.* **5**, 12895-12904 (2013).

364 12. Zhang, G. *et al.* Bio-inspired underwater superoleophobic PVDF membranes for highly-efficient  
365 simultaneous removal of insoluble emulsified oils and soluble anionic dyes. *Chem. Eng. J.* **369**, 576-587  
366 (2019).

367 13. Yang, X., Sun, H., Pal, A., Bai, Y. & Shao, L. Biomimetic silicification on membrane surface for highly  
368 efficient treatments of both oil-in-water emulsion and protein wastewater. *ACS Appl. Mater. Inter.* **10**,  
369 29982-29991 (2018).

370 14. Gao, S. J., Zhu, Y. Z., Zhang, F. & Jin, J. Superwetting polymer-decorated SWCNT composite ultrathin  
371 films for ultrafast separation of oil-in-water nanoemulsions. *J. Mater. Chem. A* **3**, 2895-2902 (2015).

372 15. Zhang, L., Lin, Y., Cheng, L., Yang, Z. & Matsuyama, H. A comprehensively fouling- and solvent-  
373 resistant aliphatic polyketone membrane for high-flux filtration of difficult oil-in-water micro- and  
374 nanoemulsions. *J. Membr. Sci.* **582**, 48-58 (2019).

375 16. Cao, J. *et al.* Self-assembled MOF membranes with underwater superoleophobicity for oil/water

376 separation. *J. Membr. Sci.* **566**, 268-277 (2018).

377 17. Li, R. *et al.* Inkjet printing assisted fabrication of polyphenol-based coating membranes for oil/water  
378 separation. *Chemosphere* **250**, 126236 (2020).

379 18. Sun, Y. *et al.* Surface hydrophilic modification of PVDF membranes based on tannin and zwitterionic  
380 substance towards effective oil-in-water emulsion separation. *Sep. Pur. Tech.* **234**, 116015 (2020).

381 19. Xie, A. *et al.* Photo-Fenton self-cleaning membranes with robust flux recovery for an efficient  
382 oil/water emulsion separation. *J. Mater. Chem. A* **7**, 8491-8502 (2019).

383 20. Cui, J. *et al.* Bio-inspired fabrication of superhydrophilic nanocomposite membrane based on surface  
384 modification of SiO<sub>2</sub> anchored by polydopamine towards effective oil-water emulsions separation. *Sep.*  
385 *Pur. Tech.* **209**, 434-442 (2019).

386 21. Wang, Z. *et al.* One-step transformation of highly hydrophobic membranes into superhydrophilic  
387 and underwater superoleophobic ones for high-efficiency separation of oil-in-water emulsions. *J. Mater.*  
388 *Chem. A* **6**, 3391-3396 (2018).

389 22. Yang, X. *et al.* Mussel-/diatom-inspired silicified membrane for high-efficiency water remediation. *J.*  
390 *Membr. Sci.* **597**, 117753 (2020).

391 23. Wang, Z. *et al.* Investigating and significantly improving the stability of tannic acid (TA)-  
392 aminopropyltriethoxysilane (APTES) coating for enhanced oil-water separation. *J. Membr. Sci.* **593**,  
393 117383 (2020).

394 24. Zhao, Y. *et al.* Ultra-robust superwetting hierarchical membranes constructed by coordination  
395 complex networks for oily water treatment. *J. Membr. Sci.* **627**, 119234 (2021).

396 25. Yang, X. *et al.* Mussel-inspired structure evolution customizing membrane interface hydrophilization.  
397 *J. Membr. Sci.* **612**, 118471 (2020).

398 26. Lu, J. *et al.* Photocatalytically active superhydrophilic/superoleophobic coating. *ACS Omega* **5**,  
399 11448-11454 (2020).

400 27. Wang, Z. *et al.* Separation of caustic nano-emulsions and macromolecular conformations with  
401 nanofibrous membranes of marine chitin. *ACS Appl. Mater. Inter.* **11**, 8576-8583 (2019).

402 28. Zhou, L. *et al.* Multifunctional filtration membrane with anti-viscous-oils-fouling capacity and  
403 selective dyes adsorption ability for complex wastewater remediation. *J. Hazard. Mater.* **413**, 125379  
404 (2021).

405
